## RESEARCH ARTICLE

# Simultaneous bioconversion of lignocellulosic residues and oxodegradable polyethylene by *Pleurotus ostreatus* for biochar production, enriched with phosphate solubilizing bacteria for agricultural use

Diana A. Moreno-Bayona<sup>1,2</sup>, Luis D. Gómez-Méndez<sup>1,2,3</sup>, Andrea Blanco-Vargas<sup>1,4</sup>, Alejandra Castillo-Toro<sup>1</sup>, Laura Herrera-Carlosama<sup>1</sup>, Raúl A. Poutou-Piñales<sup>2</sup>, Juan C. Salcedo-Reyes<sup>3</sup>, Lucía A. Díaz-Ariza<sup>4</sup>, Laura C. Castillo-Carvajal<sup>5</sup>, Naydú S. Rojas-Higuera<sup>6</sup>, Aura M. Pedroza-Rodríguez<sup>1\*</sup>

**1** Laboratorio de Microbiología Ambiental y de Suelos, Unidad de Investigaciones Agropecuarias (UNIDIA), Departamento de Microbiología, Facultad de Ciencias, Pontificia Universidad Javeriana, Bogotá, D.C., Colombia, **2** Laboratorio de Biotecnología Molecular, Grupo de Biotecnología Ambiental e Industrial (GBAI), Departamento de Microbiología, Facultad de Ciencias, Pontificia Universidad Javeriana, Bogotá, D.C., Colombia, **3** Laboratorio de Películas Delgadas y Nanofotónica, Departamento de Física, Facultad de Ciencias, Pontificia Universidad Javeriana, Bogotá, D.C., Colombia, **4** Laboratorio Asociaciones Suelo, Planta Microorganismos (LAMIC), Grupo de Investigación en Agricultura Biológica, Departamento de Biología, Facultad de Ciencias, Pontificia Universidad Javeriana, Bogotá, D.C., Colombia, **5** Facultad de Ciencias, Universidad Anahuac de México, México, D.F., México, **6** Facultad de Ciencias, Fundación Universitaria Agraria de Colombia, Bogotá, D.C., Colombia

\* These authors contributed equally to this work.

\* [apedroza@javeriana.edu.co](mailto:apedroza@javeriana.edu.co)

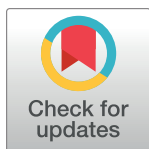

## OPEN ACCESS

**Citation:** Moreno-Bayona DA, Gómez-Méndez LD, Blanco-Vargas A, Castillo-Toro A, Herrera-Carlosama L, Poutou-Piñales RA, et al. (2019) Simultaneous bioconversion of lignocellulosic residues and oxodegradable polyethylene by *Pleurotus ostreatus* for biochar production, enriched with phosphate solubilizing bacteria for agricultural use. PLoS ONE 14(5): e0217100. <https://doi.org/10.1371/journal.pone.0217100>

**Editor:** Sartaj Ahmad Bhat, Gifu University, JAPAN

**Received:** February 18, 2019

**Accepted:** May 3, 2019

**Published:** May 16, 2019

**Copyright:** © 2019 Moreno-Bayona et al. This is an open access article distributed under the terms of the [Creative Commons Attribution License](https://creativecommons.org/licenses/by/4.0/), which permits unrestricted use, distribution, and reproduction in any medium, provided the original author and source are credited.

**Data Availability Statement:** All relevant data are within the manuscript and its Supporting Information files.

**Funding:** This work was financed by "Pontificia Universidad Javeriana Bogotá, D.C. Colombia"; as part of Grant ID: 00007681, titled "Uso combinado de hongos ligninolíticos y pirólisis para la obtención de biochar modificado empleando el modelo de bioferinera", Grant ID: 00006736, titled

## Abstract

A simultaneous treatment of lignocellulosic biomass (LCB) and low density oxodegradable polyethylene (LDPE<sub>oxo</sub>) was carried-out using *Pleurotus ostreatus* at microcosm scale to obtain biotransformed plastic and oxidized lignocellulosic biomass. This product was used as raw matter (RM) to produce biochar enriched with phosphate solubilizing bacteria (PSB). Biochar potential as biofertilizer was evaluated in *Allium cepa* culture at greenhouse scale. Experiments including lignocellulosic mix and LDPE<sub>oxo</sub> were performed for 75 days in microcosm. Biotransformation progress was performed by monitoring total organic carbon (TOC), CO<sub>2</sub> production, laccase (Lac), manganese peroxidase (MnP), and lignin peroxidase (LiP) enzymatic activities. Physical LDPE<sub>oxo</sub> changes were assessed by atomic force microscopy (AFM), scanning electron microscopy (SEM) and static contact angle (SCA) and chemical changes by Fourier transform infrared spectroscopy (FTIR). Results revealed *P. ostreatus* was capable of LCB and LDPE<sub>oxo</sub> biotransformation, obtaining 41% total organic carbon (TOC) removal with CO<sub>2</sub> production of 2,323 mg Kg<sup>-1</sup> and enzyme activities of 169,438 UKg<sup>-1</sup>, 5,535 UKg<sup>-1</sup> and 5,267 UKg<sup>-1</sup> for LiP, MnP and Lac, respectively. Regarding LDPE<sub>oxo</sub>, SCA was decreased by 84%, with an increase in signals at 1,076 cm<sup>-1</sup> and 3,271 cm<sup>-1</sup>, corresponding to C-O and CO-H bonds. A decrease in signals was observed related to material degradation at 2,928 cm<sup>-1</sup>, 2,848 cm<sup>-1</sup>, agreeing with CH<sub>2</sub> asymmetrical and

“Transformación de polietileno de baja densidad (LDPE) por medio de ablación con plasma y actividad enzimática de *Pleurotus ostreatus*”, Grant ID: 00008626, titled “Desarrollo de un biofertilizante a base de biochar y bacterias fosfato solubilizadoras para el cultivo de *Allium cepa*” and Cooperation agreement No 04861-18 between “Pontificia Universidad Javeriana (Bogotá), Colombia” and “Universidad Anahuac de México”. Phosphate solubilizing bacteria employed in this study are deposited in the microorganism collection at “Pontificia Universidad Javeriana”. Their use in research was authorized according to genetic resource and derived products access contract No. 212, resolution 00778, subscribed between the “Ministerio del Medio Ambiente y Desarrollo Sostenible de Colombia” and the “Pontificia Universidad Javeriana”. The funders had no role in study design, data collection and analysis, decision to publish, or preparation of the manuscript.

**Competing interests:** The authors have declared that no competing interests exist.

**Abbreviations:** ABTS, 2,2'-Azino-bis (3-ethylbenzothiazoline-6-sulfonic acid).; AFM, Atomic force microscopy; BC, Biochar (produced 300°C / 1 hour); BC/PSB/I, BC + PSB initial; BC/PSB/SC, BC/PSB secondary culture (before 30°C / 24 hours).; BYH, Brewing yeast hydrolysate; CFU, Colony-forming unit.; CM1, PB + CPN + BYH + *P. ostreatus*; CM2, PB + CPN + BYH + LDPE<sub>oxo</sub>; CM3, PB + CPN + BYH; CPN, Chopped paper napkins; EDS, Energy dispersive X-ray spectroscopy; FTIR, Fourier transform infrared spectroscopy; Ico, Carbonyl index; Iv, Vinyl index; Lac, Laccase; LCB, Lignocellulosic biomass.; LDPE<sub>oxo</sub>, Low density oxodegradable polyethylene; LiP, Lignin peroxidase; MnP, Manganese peroxidase; OM, Organic matter; PB, Pine bark; PO, *Pleurotus ostreatus*; PSB, Phosphate solubilizing bacteria; RM, Raw matter.; SCA, Static contact angle; SD, Standard deviation; SEI, Secondary electron image; SEM, Scanning electron microscopy; TM1, PB + CPN + BYH + LDPE<sub>oxo</sub> + *P. ostreatus*; TOC, Total organic carbon.

symmetrical stretching, respectively. PSB enriched biochar favored *A. cepa* plant growth during the five-week evaluation period. To the best of our knowledge, this is the first report of an *in vitro* circular production model, where *P. ostreatus* was employed at a microcosmos level to bioconvert LCB and LDPE<sub>oxo</sub> residues from the agroindustrial sector, followed by thermoconversion to produce an enriched biochar with PSB to be used as a biofertilizer to grow *A. cepa* at greenhouse scale.

## Introduction

Accelerated world's population growth and industrialization generate considerable quantities of solid waste, where global composition of solid waste contains 46% organic residues, 17% paper, 10% plastic, 4% metal and 18% other non-specified waste [1]. Organic residues are composed by vegetable postcrop material, agroindustrial waste and organic and inorganic household waste. In many cities and companies solid organic waste and plastic are not properly utilized, are not sorted when disposed of, thus their final elimination takes place by incineration or ends up in landfills [1–3].

Plant and flower grower industries produce vast quantities of organic waste (bark, sawdust, leaves, stems, fragmented flowers, among others) containing high amounts of lignin, cellulose and hemicellulose [4–6]. In addition, these companies use low and high-density polyethylene (LDPE and HDPE) with different purposes: packing planting material, seedling rooting, mulching, greenhouse fabrication and wrapping of product [5,6].

Due to LDPE low biodegradability it becomes another environmental problem for these industries, so it is necessary to use [7,8] new forms of LDPE, such as oxodegradable (LDPE<sub>oxo</sub>) whose molecular structure ions or metal oxides have been incorporated that catalyze the polymer's thermo/photooxidation once exposed to UV radiation or high temperatures [9,10].

Lignocellulosic residues and LDPE<sub>oxo</sub> have different chemical structures, nevertheless both are transformed when chemical, physical and biological processes are utilized. Thus, sequential or simultaneous treatments can take place, when implementing biorefineries destined to sustain solid residue biodegradable conversion; and to certain extent non-biodegradable residues, as is the case for different types of plastics to obtain bioproducts [5,11]. These in turn can be used in other productive processes favoring sustainable natural resources use [12–14].

To carry out simultaneous bioconversion of LCB and LDPE<sub>oxo</sub> different types of microorganisms can be used, by themselves, in co-cultures or in consortiums [15–17]. From an array of microorganisms studied, lignolytic white rot fungi are the most efficient to perform partial or total biotransformation of these types of solid residues [16–19] because of: (i) form networks of mycelia and produce exopolysaccharides that aid in colonization of both materials [6,20], (ii) produce an ample gamut of extracellular enzymes such as ligninases (E.C. 1.11.1.14), cellulases (E.C. 3.2.1.4) and hemicellulases (E.C. 3.2.1.), hydrolyzing hydrophilic and hydrophobic polymers generating smaller subunits [4,6], (iii) respond positively to addition of redox mediators to increase redox potential of enzymes, such as Lac (E.C. 1.10.3.2); allowing lignin non-aromatic fractions and LDPE<sub>oxo</sub> aliphatic amorphous fractions to be oxidized [1] and (iv) oxidize aromatic and aliphatic subunits in lignocellulosic biomass and plastic in a non-selective manner, through non-enzymatic processes such as biological Fenton producing oxygen reactive species like hydroxyls [21,22].

Fungus use for simultaneous LCB and LDPE<sub>oxo</sub> treatment can be effective, whenever physical and chemical factors are taken into account, such as temperature and moisture, pH, aeration, particle size and C/N ratio [18,23,24].

On the other hand, to favor LDPE<sub>oxo</sub> biotransformation physical or chemical pre-treatment must be carried-out [25,26]; particularly it has been observed O<sub>2</sub> plasma discharge under low pressure conditions, facilitate LDPE biotransformation, as it increases its hydrophilicity, due to polar hydroxyl and carbonyl group formation. Plasma discharge generates an ablation on the material's surface, helping with mycelium colonization exposing amorphous parts of the polymer [6,27].

Once simultaneous LCB and LDPE<sub>oxo</sub> treatments are carried-out various bio-products are obtained, such as biotransformed plastic, CO<sub>2</sub> and partially oxidized LCB. Low-density polyethylene can be reused in a new transformation process or recycled. Carbon dioxide is captured and redirected for bioconversion processes, such as microalgae production under autotrophic and mixotrophic conditions [28]. Last, oxidized LCB can be incorporated in another biorefinery stage requiring a thermochemical treatment for biochar production.

Biochar is a biocarbon variety that when applied by itself or enriched with beneficial microorganisms (PSB, nitrogen fixing bacteria, bacteria promoting plant growth, among others) is useful in microorganism support and improves the soil's physical and chemical properties [29–31]. Hence, nutrient disposition is considerably favored, thus increasing greenhouse or field plant growth in comparison with soil or a mixture of soil with materials such as peat, coconut fiber, raw sawdust, rice husk or vermiculite, among others [29–31].

Development of environmental sustainable technologies is important to diminish agriculture industry negative impact. In countries such as Colombia, in the past 10 years plant and flower growing industries have worked in implementing good agricultural practices to decrease plastic use and control inadequate overexploitation and contamination, bringing about diminished edaphic biodiversity and decreased soil fertility resulting in loss of agricultural system productivity. In addition, generation of lignocellulosic residues or photobiomass is considered another critical issue for these industries, since residues are generated in enormous quantities. Their accumulation has a negative impact on the environment and their disposal is costly, since residues cannot be easily biotransformed, hence alternatives must be sought. Therefore, the present work proposed to demonstrate through a co-metabolism process the feasibility to perform simultaneous bioconversion of lignocellulosic biomass and low density polyethylene employing *P. ostreatus* as a low specificity enzyme complex producer. In addition, this work demonstrated the possibility to employ the bioconversion product for thermic biochar generation with physical and chemical properties that allow for phosphate solubilizing bacteria immobilization and its use to grow *A. cepa* at greenhouse scale.

Therefore, the objective of this study was to simultaneously treat LCB containing a mix of pine bark (PB), chopped paper napkins (CPN) and brewing yeast hydrolysate (BYH) and LDPE<sub>oxo</sub> employing *P. ostreatus* at microcosm scale to obtain oxidized LCB and biotransformed plastic as RM to produce biochar enriched with PSB. Its potential use was evaluated as a biofertilizer in *Allium cepa* at seedbed scale.

## Materials and methods

### Fungus reactivation and propagation in liquid media

*Pleurotus ostreatus* was obtained from the bank of strains at the Pontificia Universidad Javeriana Laboratory for Environmental microbiology and soil, Bogotá, D.C., Colombia. *P. ostreatus* was reactivated in wheat bran extract agar (175 gL<sup>-1</sup> wheat bran, 10 gL<sup>-1</sup> glucose, 2 gL<sup>-1</sup> yeast extract, 5 gL<sup>-1</sup> peptone, 0.05 gL<sup>-1</sup> MgSO<sub>4</sub>·7H<sub>2</sub>O, 0.076 gL<sup>-1</sup> MnSO<sub>4</sub>·H<sub>2</sub>O, 0.1 gL<sup>-1</sup> KH<sub>2</sub>PO<sub>4</sub>, 0.1 gL<sup>-1</sup> chloramphenicol, 20 gL<sup>-1</sup> agar-agar) and incubated for eight days at 28°C [6,32]. For pelleted biomass production wheat bran extract broth was employed (the same wheat bran media without the agar) in 250 mL Erlenmeyer flask with 130 mL media, inoculated with 10 wheat

agar discs containing the fungus' mycelium. Erlenmeyer flasks were incubated for 10 days at 28°C under agitation at 120 rpm. After incubation, culture was centrifuged at 9,790 x g Sorvall RC 6 plus for 10 minutes at 4°C, biomass was washed five times) the first four with 0.85% (w/v) saline solution and the last with a 0.625 gL<sup>-1</sup> glucose and 0.050 gL<sup>-1</sup> ammonium chloride solution.

### Pristine LDPE<sub>oxo</sub> sheet oxygen plasma pre-treatment

To obtain pristine LDPE<sub>oxo</sub> sheets commercial "plastic bags" were cut into (3.0 ± 0.1) cm x (1.0 ± 0.1) cm sheets. Each sheet was washed for two minutes with 99.8% v/v methanol (Merck) and dried at 14°C for 15 minutes. Subsequently they were treated with glow discharge plasma (O<sub>2</sub>, 3.0 x 10<sup>-2</sup> mbar, 600 V, 6 min), [6].

### Simultaneous lignocellulosic biomass (LCB) and plasma treated LDPE<sub>oxo</sub> transformation curves under microcosm system

Previous to biotransformation curves, a 2<sup>3</sup> factorial design with three central points was performed to select plant dry matter proportion as part of LCB's rich filling mixture for microcosm evaluation (S1 Supplementary Material). Response variables were colonization percentage (%), total organic carbon (TOC), organic matter (OM) and Lac, MnP, and LiP enzyme activities. Selection of the best mix was determined by ANOVA analysis and mean comparison using Design-Expert (Stat-Ease Inc. 2017. version 11.0. Minneapolis, MN: Stat-Ease) and SAS (SAS Institute 2017. version STAT 14.3. Cary, NC: SAS Institute) softwares.

Once the best filling mixture was selected, microcosm system set-up was performed in 750 mL glass bottles, with hermetic seal rubber stopper adapted for a "J" aeration system incorporating a 0.22 μm gage Millex-GP SLGP033RB syringe, a port for nutrient input and an outlet for gas exit, connected to a 0.4 N NaOH trap for CO<sub>2</sub> capture. Each microcosm was continuously aerated at a 135 mL min<sup>-1</sup> ratio, employing a Xilong AP-005 (110 V-60 Hz) engine, [4]. To each microcosm a mixture composed of 24 g PB, 27 g CPN and 9 g BYH in addition to 3% moist *P. ostreatus* biomass, 0.2 mL g<sup>-1</sup> nutrient solution (MnSO<sub>4</sub> gL<sup>-1</sup> 0.5 gL<sup>-1</sup>, FeSO<sub>4</sub>·7H<sub>2</sub>O 0.1gL<sup>-1</sup>, ZnSO<sub>4</sub>·7 H<sub>2</sub>O 0.1gL<sup>-1</sup>, CuSO<sub>4</sub> 1.5gL<sup>-1</sup>, ABTS 0.1mM), were supplemented every eight days and five plasma treated LDPE<sub>oxo</sub> sheets were added. Mean temperature incubation was 22°C, for a 75-day evaluation period. Once the experiments were initiated, in addition to air injection each unit was handled under non-aseptic conditions. Bottles were manually turned upside down to guarantee biomass growth, mixture homogeneity, and increase *P. ostreatus* surface contact with plasma treated LDPE<sub>oxo</sub> sheets.

Each treatment (TM1) and controls (CM1, CM2 and CM3) were evaluated by triplicates. In addition, every 15 days samples were collected to analyze response variables associated with LCB and plasma treated LDPE<sub>oxo</sub> sheets and their association with Lac, MnP, and LiP activities. An aliquot of biotransformed LCB was used to quantify response variables, the remainder was used for biochar's production, characterization, and employment for greenhouse *Allium cepa* growth experiments. LDPE<sub>oxo</sub> was used for plastic characterization, and CO<sub>2</sub> was captured with a NaOH trap to determine its concentration by respirometry assays.

### Microcosm biotransformed LCB thermal post-treatment

Microcosm biotransformed LCB in addition contained *P. ostreatus* mycelia, due to fungus growth during microcosm assay. This mixture rich in lignin, cellulose, hemicellulose, yeast hydrolysate and fungus mycelia were identified as RM and employed for biochar (BC) production. Initially, RM was dried at 90°C for 24 h, and sieved to obtain an approximately 5 mm particle size.

For BC production, 100 g RM were placed in an aluminum tray and introduced in a muffle furnace (Labtech), where a  $10^{\circ}\text{C min}^{-1}$  heat ramp was applied until reaching  $300^{\circ}\text{C}$ , followed by  $150\text{ mL min}^{-1}\text{ N}_2$  injection.  $\text{N}_2$  addition was repeated after 30 minutes to produce BC300 under  $\text{O}_2$  reduced conditions for 1 hour [33,34].

For RM, as well as BC moisture percentage, pH and topographic analysis were performed through SEM coupled to EDS, [4,35,36].

### Biochar phosphate solubilizing bacteria enrichment and *Allium cepa* growth evaluation under greenhouse conditions

To enrich BC with PSB, (BC/PSB) first a biofertilizer was produced with *Pseudomonas* sp., *Serratia* sp., and *Kosakonia* sp. in MT11B media ( $5.0\text{ g L}^{-1}$  phosphate rock (Calboy),  $2.5\text{ g L}^{-1}$  glucose,  $0.5\text{ g L}^{-1}$  BYH,  $0.5\text{ g L}^{-1}$   $(\text{NH}_4)_2\text{SO}_4$ ,  $0.2\text{ g L}^{-1}$  KCl,  $0.3\text{ g L}^{-1}$   $\text{MgSO}_4$ ,  $0.004\text{ g L}^{-1}$   $\text{MnSO}_4 \cdot 7\text{H}_2\text{O}$ ,  $0.0004\text{ g L}^{-1}$   $\text{FeSO}_4$  and  $0.2\text{ g L}^{-1}$  NaCl) at  $\text{pH } 7.0 \pm 0.2$  for 6 h at  $30^{\circ}\text{C}$  and 200 rpm. Phosphate rock composition was: 25% total phosphate ( $\text{P}_2\text{O}_5$ ), 32% calcium (CaO), 14% silica ( $\text{SiO}_2$ ) and 0.5% aluminum ( $\text{Al}_2\text{O}_3$ ), (<http://www.calboy.co>). Final, biofertilizer's concentration was 10 colony-forming unit (CFU)  $\text{mL}^{-1}$  logarithmic units. Subsequently, 100 mL of biofertilizer were mixed with 100 g BC and manually homogenized for 5 minutes until BC was completely moistened with PSB, thus here referred to as BC/PSB initial (I) (BC/PSB/I). Following, BC/PSB/I was incubated for 24 h at  $30^{\circ}\text{C}$  to generate a secondary culture (BC/PSB/SC) to replace bacteria that could have been injured during formulation or bioenrichment protocol following methods under Colombian Patent No. 13094384, 2015-09-17 [37].

BC/PSB/I concentration determination was performed through the decimal dilution technique and modified agar SMRS-1 surface count ( $0.5\text{ g L}^{-1}$   $(\text{NH}_4)_2\text{SO}_4$ ,  $0.2\text{ g L}^{-1}$  KCl,  $0.3\text{ g L}^{-1}$   $\text{MgSO}_4 \cdot \text{H}_2\text{O}$ ,  $0.004\text{ g L}^{-1}$   $\text{MnSO}_4 \cdot \text{H}_2\text{O}$ ,  $0.0004\text{ g L}^{-1}$   $\text{FeSO}_4 \cdot 7\text{H}_2\text{O}$ ,  $0.2\text{ g L}^{-1}$  NaCl,  $10\text{ g L}^{-1}$  glucose,  $0.5\text{ g L}^{-1}$  yeast extract) enriched with  $5\text{ g L}^{-1}$  phosphate rock. In addition, pH was determined following the protocol indicated by the Colombian technical Standard 5167 [35].

Five seeds of *A. cepa* were seeded buried at 3 cm depth and covered with the same material. Containers were maintained under greenhouse conditions ( $15^{\circ}\text{C}$  with 12 h light/dark cycles, watering every 8 days) for five weeks. At the end of the growth ( $n = 5$ ) plant response variables were quantified fresh weight (g) and height (cm). For solid samples PSB count and pH were determined [38].

### Biological, chemical and physico-chemical parameter quantification

To determine Lac, MnP, and LiP enzyme activity in microcosm, the sheets were removed, all filling material was mixed and 4 grams were extracted for solid-liquid extraction with addition of 50 mM sodium acetate buffer ( $\text{pH } 5.0 \pm 0.2$ ) and 0.01% Tween 80 (v/v) at a 1:5 ratio. Extraction was maintained under agitation at 200 rpm for 5 h. The mixture was filtered through Whatman No. 3 filter paper and centrifuged at  $8,000 \times g$  for 15 minutes to obtain and extract, where enzyme activities were evaluated [4].

Laccase activity (EC. 1.10.3.2) was quantified following a reported methodology [39] using 5 mM ABTS as substrate. One Lac unit is defined as the quantity of enzyme required to oxidize  $1\text{ }\mu\text{mol}$  ABTS in 1 minute. For MnP (EC. 1.11.1.13) activity 2,6 dimethoxyphenol in sodium acetate buffer (100mM) was used as substrate. MnP activity is defined as the quantity of enzyme required to oxidize  $1\text{ }\mu\text{mol}$  2,6 dimethoxyphenol per minute [40]. LiP activity was determined by the oxidation of 2.7 mM veratryl alcohol. One unit of enzyme activity (U) is equivalent to the quantity of enzyme required to oxidize  $1\text{ }\mu\text{mol}$  veratryl alcohol per minute [39,41].

pH and moisture percentage were determined following the methodology reported in Colombian Technical Standard 5167 of 2011 [42].  $\text{CO}_2$  production was determined by the

respirometry method. An acid-base titration was carried out, where produced CO<sub>2</sub> reacted with 0.4 N NaOH [43].

Total organic carbon and OM content were assayed following the AASHTO T 267–86 protocols [44]. On the other hand, lignin was first extracted by performing a 0.5 M KOH lignin extraction, and then quantified employing the Tannin/Lignin test kit (HACH). Concentration was evaluated in HACH DR 2800 spectrophotometer at 700 nm [45]. To calculate E4/E6 ratio and determine polymerization level the same alkaline extracted sample was used, and absorbance were read at 465 nm and 665 nm, respectively. The E4/E6 ratio is calculated by dividing absorbance at 465 nm by absorbance at 665 nm [45,46]. To calculate C/N ratio samples were collected at day 0 and day 75 to determine nitrogen concentration and calculate C/N ratio by the Kjeldahl Bremmer method [47].

LDPE<sub>oxo</sub> hydrophobicity change was determined in triplicate by the previously reported SCA method [48] and adjusted [6]. To define sheet surface roughness, sheets were observed through an atomic force microscope on contact mode (Nanosurf easyscan 2). Condition parameters for acquiring measurements were: size: 61.8 μm, set point: 50 nN; P-Gain: 1000; I-Gain: 100; D-Gain: 0 [49]. Each determination was performed in triplicate.

Pristine or plasma treated LDPE<sub>oxo</sub> topography, as well as *P. ostreatus* material colonization was analyzed by SEM (Jeol JSM 6490LV). Specimens were first coated with a thin layer of gold under vacuum conditions with a Denton Vacuum sputter coater Desk IV. Specimens were examined using the following configurations: an accelerating voltage between 20 kV– 30 kV, SEI (Secondary Electron Image) signal and direct magnification at 500 and 6,500 X. To reveal the material's chemical mapping, the same equipment was used to perform an EDS, [6]. This service was provided by Universidad de los Andes (Bogotá, D.C., Colombia).

To identify functional chemical groups FTIR analysis was performed using a Shimadzu IR Prestige-21 spectrophotometer. FTIR configurations were: Measurement Mode: % transmittance, Apodization: Happ-Genzel, No. of scans: 20, Resolution: 4.0, Range (cm<sup>-1</sup>): 400–4000 [6]. From spectrum collected data, carbonyl (*Ico*) [50] and vinyl (*Iv*), [51] indices were obtained.

## Statistical analysis

Microcosm experiment results, biochar production, and *Allium cepa* assays were first evaluated for parametric statistic compliance assumptions by performing normality tests (Shapiro-Wilks) and homogeneity of variance (Levene). using SPSS software (IBM Corp. 2013. IBM SPSS for Macintosh version 22.0. Armonk, NY: IBM Corp). To determine statistical differences among treatments ANOVA was used with Tukey *post-hoc* test.

## Results

### LCB and previously plasma treated LDPE<sub>oxo</sub> simultaneous transformation curves in microcosm system

*P. ostreatus* microcosm set-out for lignocellulosic material and LDPE<sub>oxo</sub> sheet biotransformation (S2 and S3 Tables). From all response variables analyzed among treatments based on ANOVA and mean comparisons, colonization percentage and enzyme activities were prioritized, since colonization and high enzyme activities can favor LCB and LDPE<sub>oxo</sub> biotransformation. For colonization percentage interaction among the three factors PB, CPN and BYH was significant ( $p = 0.0041$ ) with a 28% contribution percentage. Regarding enzyme activities, different effects were observed depending on factors. Therefore, interaction among ABC factors was selected, with  $p$  values of 0.0041, 0.0489 and 0.0452 for colonization percentage, MnP

and LiP activities, respectively. With reference to mean comparison among treatments, T8 was selected (24 g PB, 27 CPN and 9 g BYH) to carry on with microcosm, since at 10 days of evaluation it presented significant differences among treatments for: colonization percentage (99%), ( $p = 0.0048$ ) and enzyme activities of 380, 167 and 14280 U Kg<sup>-1</sup> ( $p = 0.0043$ ,  $p = 0.0039$  and  $p = 0.0026$ ), (S4 Table), for Lac, MnP y LiP, respectively.

In microcosm experiments system initial moisture oscillated between 36 and 25%, where TM1 (PB + CPN + BYH + LDPE<sub>oxo</sub> + *P. ostreatus*) and CM1 (PB + CPN + BYH + *P. ostreatus*) microcosm with *P. ostreatus* moist biomass had the highest moisture percentage. In these experimental units a gradual moisture increase was observed, until reaching at day 30 maximum values of 80 and 79%, followed by a decrease to end up at 65 and 66% moisture on day 75 of the process. These percentages were significantly higher (TM1:  $p = 0.002$  and CM1:  $p = 0.023$ ) when compared with CM2 (PB + CPN + BYH + LDPE<sub>oxo</sub>) and CM3 (PB + CPN + BYH) (26 and 33%), which could be attributed to supplementation with a nutrient solution every eight days. In addition, *P. ostreatus* biomass growth could have contributed to differences in moisture, since mycelium can retain up to 50–75% moisture when in solid culture (Fig 1A). For treatments and controls pH was below  $6.5 \pm 0.2$  and for TM1 and CM1 a slight pH decrease as a function of time was observed, where  $5.3 \pm 0.2$  was the lowest value at day 15 for TM1, subsequently increasing, but never above  $6.5 \pm 0.2$ . For controls pH ranged between  $5.4 \pm 0.2$  and  $5.6 \pm 0.2$  (0 and 75 days), (Fig 1B).

*P. ostreatus* inoculation and growth favored CO<sub>2</sub>-C emission production kinetics, with significantly higher values for TM1 and CM1 in comparison with CM2 and CM3, respectively (TM1: 31 vs. CM2 11.1 mg Kg<sup>-1</sup> d<sup>-1</sup>  $p = 0.014$  and CM1: 24.2 mg Kg<sup>-1</sup> d<sup>-1</sup> vs. CM3: 11.5 mg Kg<sup>-1</sup> d<sup>-1</sup>  $p = 0.011$ ). CM2 and CM3 lower CO<sub>2</sub> emission production could be associated with abiotic factors or presence of accompanying microorganisms, with decreased capacity to mineralize LCB and plasma treated LDPE<sub>oxo</sub> (Fig 1C).

On the other hand, CO<sub>2</sub> emission production as a microcosm biotransformation indicator was inversely related to a decrease in TOC percentage for TM1 and CM1 ( $\rho = -0.85$ ,  $p < 0.026$  and  $\rho = -0.81$ ,  $p < 0.015$ ) respectively, which was more efficient for experimental units containing *P. ostreatus* and plasma treated LDPE<sub>oxo</sub>. Initial percentage for TM1 treatment was 58% and gradually decreased to 34%, representing a 41% TOC removal at 75 day of treatment. A lesser decrease was observed for CM1 treatment inoculated with *P. ostreatus*, not containing plasma treated LDPE<sub>oxo</sub> (14%). Total organic carbon was similar for controls without *P. ostreatus* and did not changed more than 10%. Additionally, total nitrogen percentage was determined to calculate C/N ratio at the beginning and at the end of the process. At the beginning they were 50 and 48% for TM1 and CM1, respectively. After 75 days of treatment they decreased to 42% for TM1 and 21% for CM1. C/N ratio for CM2 and CM3 controls were 44% and after 75 days they did not exceed 20% (Fig 1D).

Soluble lignin and E4/E6 ratio results, extracted in 0.5 M KOH solution are presented in Fig 1E and 1F. Under these conditions only soluble polymeric or aliphatic fractions are presented, and not total, since part of them remained tightly bound to LCB's cellulose and hemicellulose. For TM1 and CM1 during the first 30 and 45 days no detectable increase in lignin concentrations was observed, suggesting this polymer was not used as substrate during this initial time. In contrast, other simpler compounds, such as cellulose from paper napkins, BYH and added glucose to nutrient solution were employed to initiate biotransformation and fungal biomass growth within the microcosm. Subsequently (day 45) a gradual increase in soluble lignin concentration was observed with final concentrations at day 75 for TM1 and CM1 of 153 and 90 mg Kg<sup>-1</sup>, respectively. These treatments were significantly greater compared with plasma treated LDPE<sub>oxo</sub> sheets and *P. ostreatus* biomass ( $p = 0.0231$ ). This increase suggested initiation of total LCB lignin biotransformation, thus augmenting soluble lignin fraction.

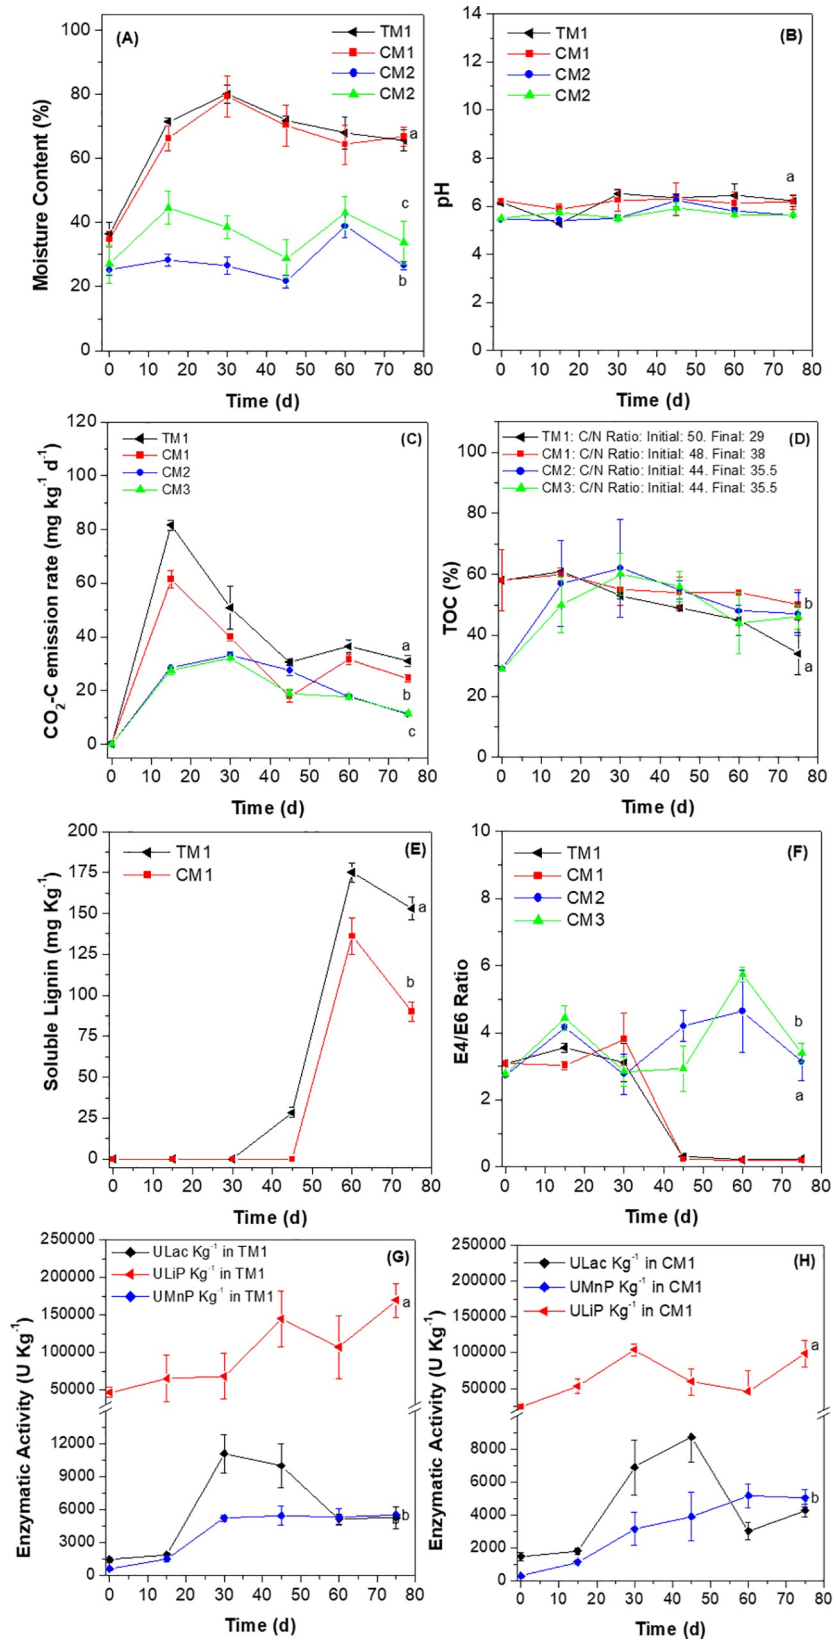



**Fig 1. Microcosm analysis along 75 days.** (A) Moisture percentage. (B) pH. (C) CO<sub>2</sub>-C emission rate (mg Kg<sup>-1</sup> d<sup>-1</sup>). (D) Total organic carbon (TOC) percentage. (E) Lignin content (mg Kg<sup>-1</sup>). (F) E4/E6 ratio. (G) and (H) Lac (U Kg<sup>-1</sup>), LiP (U Kg<sup>-1</sup>) and MnP (U Kg<sup>-1</sup>) lignolytic activities. PB, CPN and BYH mixture. PO: *P. ostreatus*. TM1: Mix + PO + LDPE<sub>oxo</sub>. CM1: Mix + PO. CM2: Mix + LDPE<sub>oxo</sub>. CM3: Mix. Results presented correspond to mean of three replicas.

<https://doi.org/10.1371/journal.pone.0217100.g001>

Concerning polymerization ratio between aromatic and aliphatic fractions (E4/E6) initial treatment values for treatment T1 and controls (CM1, CM2, and CM3) were very similar and oscillated between 2.8 and 3.1. A stark decrease in E4/E6 ratio was detected at 45 days of treatment, obtaining values of 0.2 for TM1, as well as CM1. These semiquantitative results suggest a greater release of high molecular weight compounds with higher level of aromaticity was observed. TM1 E4/E6 results are inversely associated with soluble lignin concentration after 45 days of treatment, since for this later variable an increase was observed ( $\rho = -0.90, p < 0.0013$ ). Even though for CM2 and CM3 controls, a variation as a function of time from day 0 to 75 was presented, E4/E6 ratio did not decrease below 1.0, demonstrating compound release with greater aromaticity level or condensation could not take place. On the contrary, the tendency was similar to absorption at 465 nm as well as 665 nm (Fig 1F).

Relating to lignolytic activities (Lac, MnP and LiP), TM1 and CM1 tendencies were similar. Never the less, TM1 activities were significantly higher than CM1 control for Lac, MnP and LiP ( $p = 0.0078, p = 0.095$  and  $p = 0.0013$ ). For TM1 LiP and MnP increased as a function of time, possibly they were responsible for lignin's aromatic and non-aromatic fraction oxidation. Hence, LiP activity was the highest among all three enzymes with a value of 169,438 U Kg<sup>-1</sup> at day 75. MnP enzyme activity oscillated between 624 and 5,535 U Kg, where this later value was observed at day 75 (Fig 1G).

For TM1 Lac activity increased from day 15 to day 30, in contrast with peroxidase activities, its highest attained value was at day 30 with 11,089 U Kg<sup>-1</sup> activity, followed by a decrease to end with an activity of 5,267 U Kg<sup>-1</sup> (Fig 1G). In contrast, CM1 activities were lower compared with TM1 at 75 days obtaining values of 98,655, 5,023 and 4,273 U Kg<sup>-1</sup> for LiP, MnP and Lac respectively. This difference could be associated with absence of plasma treated LDPE<sub>oxo</sub> sheets, and to 2,2'-Azino-bis (3-ethylbenzothiazoline-6-sulfonic acid) (ABTS) redox mediator supplementation. This redox mediator increases laccase oxidation potential favoring non-aromatic lignin fractions and aliphatic type compounds with C-H bonds, such as those present in plasma treated LDPE<sub>oxo</sub> sheets.

As lignocellulosic biomass transformation associated variables were analyzed, plasma treated LDPE<sub>oxo</sub> changes such as SCA, roughness, FTIR, AFM and SEM were studied to evaluate both byproducts simultaneous effects. Table 1 illustrates LDPE<sub>oxo</sub> SCA and roughness at day 75.

The most significant response variable was SCA ( $p = 0.001$ ), (Table 1), demonstrating after 75 days LDPE<sub>oxo</sub> sheets introduced into TM1 microcosm presented an 84% SCA decrease, while those introduced into CM2 microcosm percentage was 67%. LDPE<sub>oxo</sub> roughness

**Table 1. Plasma treated LDPE<sub>oxo</sub> sheet physical changes SCA, roughness and Ico/Iv indices after 75 days in the microcosm.**

| Microcosm      | TM1      |        |                       | CM2      |        |                    |
|----------------|----------|--------|-----------------------|----------|--------|--------------------|
|                | Pristine | Day 75 | Change at 75 d (%)    | Pristine | Day 75 | Change at 75 d (%) |
| SCA (°)        | 86 ± 3   | 14 ± 6 | <b>84<sup>a</sup></b> | 86 ± 3   | 28 ± 7 | 67 <sup>b</sup>    |
| Roughness (nm) | 10 ± 1   | 13 ± 3 | <b>30<sup>a</sup></b> | 10 ± 1   | 11 ± 1 | 10 <sup>b</sup>    |
| Ico            | 1.77     | 1.64   | <b>8<sup>a</sup></b>  | 1.77     | 1.72   | 3 <sup>b</sup>     |
| Iv             | 1.06     | 1.04   | <b>2<sup>a</sup></b>  | 1.06     | 1.05   | 1 <sup>b</sup>     |

Results in bold with letter **a**, were significantly different ( $p < 0.05$ ) related to results with letter **b**

<https://doi.org/10.1371/journal.pone.0217100.t001>

presented a 20% difference between TM1 and CM2 ( $p = 0.00433$ ). Carbonyl index ( $I_{co}$ ) and Vinyl index ( $I_v$ ) variations were 8% and 2% for TM1 and for CM2 of 2% and 1%.

To determine sheet roughness SEM and AFM microscopic images were used to determine sheet roughness. Pristine LDPE<sub>oxo</sub> SEM and AFM images showed a homogenous and slightly rough surface (Fig 2A and 2B). Scanning electron microscopy image revealed *P. ostreatus* growth on the material's surface (Fig 2C), where spores could be detected by AFM (Fig 2D).

Fig 3 depicts FTIR obtained from LDPE<sub>oxo</sub> after 75 days incubation in microcosm (red line). A slight increase in signals at  $1,076\text{ cm}^{-1}$  and  $3,271\text{ cm}^{-1}$ , as well as  $875\text{ cm}^{-1}$  were present indicating material oxidation process took place, corresponding to C-O and CO-H bonds, and ether bonds or peroxides respectively. In addition, a decrease in signals at  $2,926\text{ cm}^{-1}$  and  $2,846\text{ cm}^{-1}$  were observed, corresponding to CH<sub>2</sub> asymmetrical and symmetrical stretching, respectively, associated with mass loss.

### Greenhouse biochar production: characterization and properties

The solid organic bioproduct obtained after 75 days of biotransformation in all microcosm systems (treatments and controls) was mixed to use as RM to carry out biochar (BC)

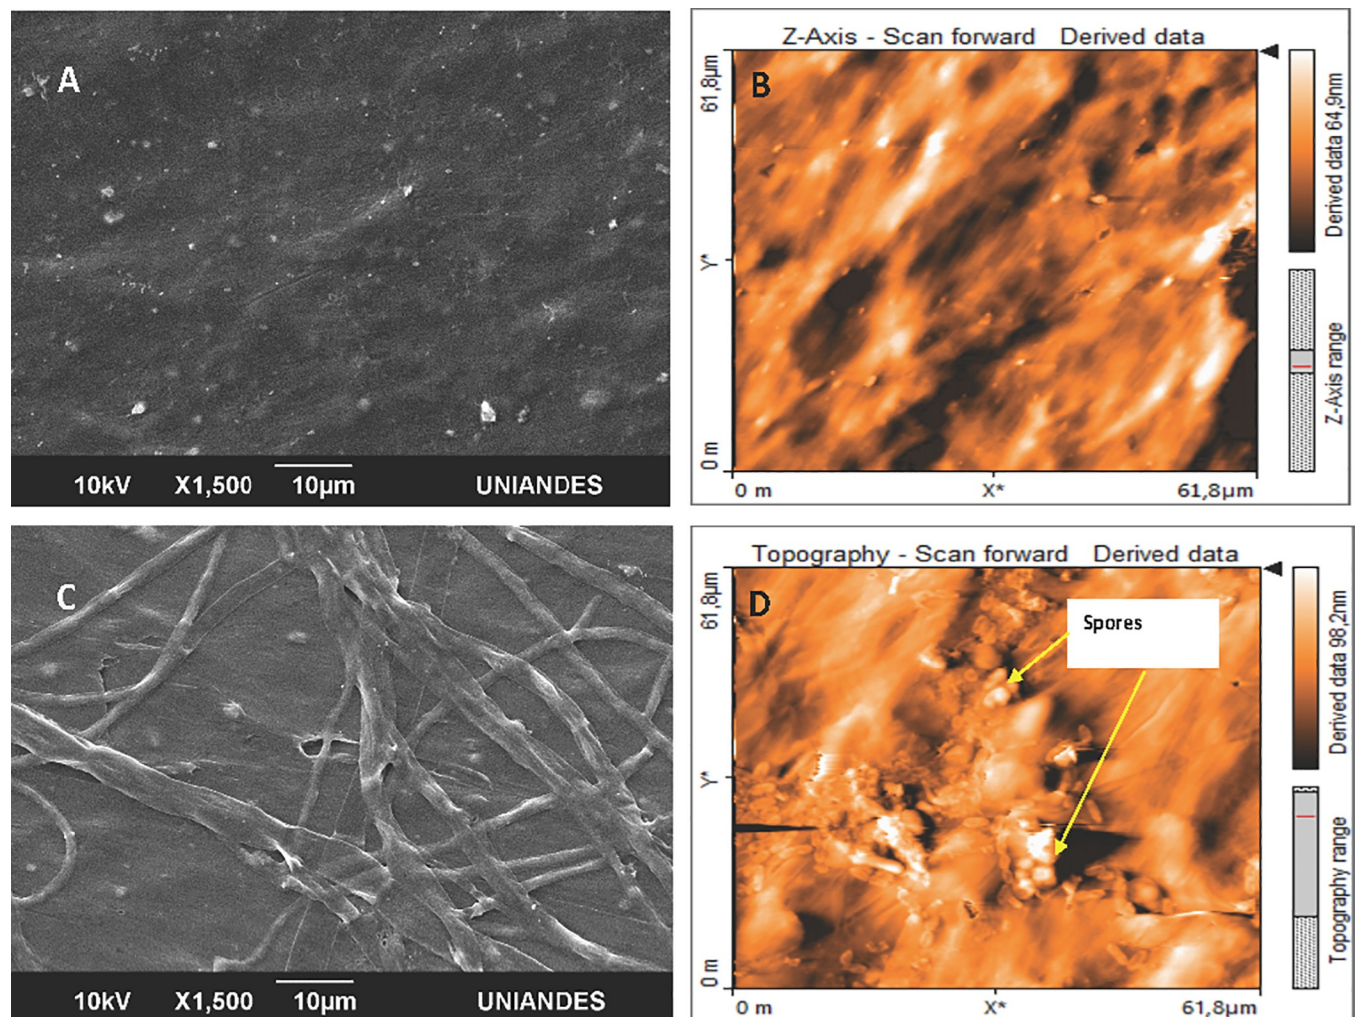

**Fig 2.** SEM (A, C) and AFM (B, D) microscopic images. (A, B) Pristine LDPE<sub>oxo</sub>. (C) LDPE<sub>oxo</sub> SEM image after 75 days in microcosm. (D) LDPE<sub>oxo</sub> AFM image after 75 days in microcosm.

<https://doi.org/10.1371/journal.pone.0217100.g002>

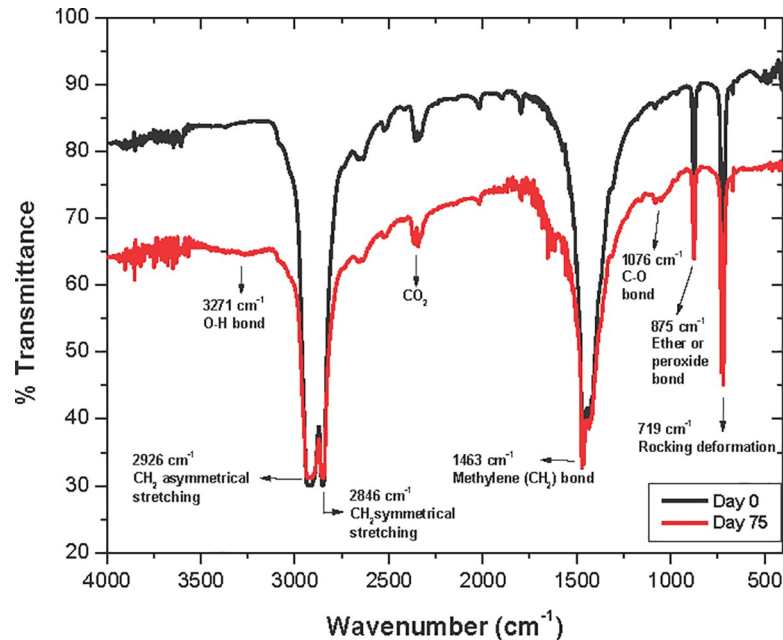

**Fig 3.** FTIR analysis for plasma treated LDPE<sub>oxo</sub> sheets before incubation at day 0 (black line) and after 75 days of incubation in microcosm system (day 75: red line).

<https://doi.org/10.1371/journal.pone.0217100.g003>

production. Raw matter had a pH of  $6.1 \pm 0.2$ , consisted of 74% organic matter (OM), 56% TOC, 3.7% total nitrogen, a C/N ratio of 15, total bacteria count of  $2.0 \text{ Log}_{10} \text{ CFU g}^{-1}$  and total fungi (*P. ostreatus* and yeasts) of  $4.0 \text{ Log}_{10} \text{ de CFU g}^{-1}$  (Table 2).

This mixed RM was subjected to heating ( $300^\circ\text{C}/1 \text{ hour}$ ) to obtain the BC, whose production showed changes for all parameters. pH increased to  $7.3 \pm 0.2$ , organic matter (OM) and TOC decreased to 54 and 31%, respectively. Additionally, all microorganism counts were below  $2.0 \text{ Log}_{10} \text{ CFU g}^{-1}$ . Regarding proximate analysis BC yield was 53% with a 0.1% moisture percentage. Carbon fractions were 72, 25, and 2.9% for the volatile and fixed fractions, and ash content, respectively. Therefore, produced BC was classified as Class II (organic carbon  $\geq 30$  and  $\leq 60\%$ ), [52]. Carbon, hydrogen and oxygen element composition was evaluated in produced RM and BC. For carbon the thermochemical process generated an increase from 44.5 to 87%, and a decrease in oxygen from 12.5 to 0.5%. Moreover, degree of maturation and aromaticity was determined calculating H/C and O/C molar ratios, with values of 0.105 and 0.143, respectively (Table 2).

Once BC was produced and characterized it was enriched and formulated with PSB made up of *Pseudomonas* sp., *Serratia* sp., and *Kosakonia* sp. (unpublished results), and was named BC initial BC/PSB/I. The one obtained after 24 h of culture at  $30^\circ\text{C}$  was designated as secondary or (BC/PSB/SC). Both biochar (BC/PSB/I and BC/PSB/SC) were characterized to detect possible changes in basic properties, proximate analysis, element analysis and microorganism counts. For newly enriched BC (BC/PSB/I) a decrease in pH ( $5.9 \pm 0.2$ ), was observed, organic matter percentages and TOC (82 and 48%) increased, which could be associated with bacterial liquid culture supplementation. At 24 h of the BC/PSB/SC, pH increased to  $7.0 \pm 0.2$ , as well as OM and TOC (95 and 53%, respectively). These increases were associated with PSB within the BC and possible biofilm synthesis. Initial PSB counts at 24 h were high ( $9.5$  and  $10.9 \text{ Log}_{10} \text{ CFU g}^{-1}$ , respectively). A 1.5 log unit increase suggests SC allowed for injured bacterial cell replication. Morphological counts were high and similar, oscillating between  $8.3$  and  $10.9 \text{ Log}_{10}$

**Table 2. Raw matter proximate and element analysis for biochar produced and PSB formulation.**

| Sample                                                                   | RM        | BC        | BC with PSB at initial formulation<br>BC/PSB/I | BC with PSB at 30° C/24 h<br>BC/PSB/SC |
|--------------------------------------------------------------------------|-----------|-----------|------------------------------------------------|----------------------------------------|
| <b>Basic properties</b>                                                  |           |           |                                                |                                        |
| pH                                                                       | 6.1 ± 1.1 | 7.3 ± 0.1 | 5.9 ± 0.2                                      | 7.0 ± 1                                |
| OM (%)                                                                   | 74 ± 3    | 54 ± 3    | 82 ± 4                                         | 95 ± 6                                 |
| TOC (%)                                                                  | 56 ± 4    | 31 ± 1    | 48 ± 3                                         | 53 ± 2                                 |
| N (%)                                                                    | 3.7       | ND        | ND                                             | ND                                     |
| C/N ratio                                                                | 15        | ND        | ND                                             | ND                                     |
| Total bacteria Count<br>(Log <sub>10</sub> CFU g <sup>-1</sup> )         | 2.0       | < 2.0     | 9.5 ± 1.1                                      | 10.9 ± 1.7                             |
| Total fungi Count<br>(Log <sub>10</sub> CFU g <sup>-1</sup> )            | 4.0       | < 2.0     | < 2.0                                          | < 2.0                                  |
| Total PSB Count<br>(Log <sub>10</sub> CFU g <sup>-1</sup> )              | < 2.0     | < 2.0     | 9.5 ± 1.1                                      | 10.9 ± 2.3                             |
| <i>Pseudomonas</i> sp. Count<br>(Log <sub>10</sub> CFU g <sup>-1</sup> ) | < 2.0     | < 2.0     | 8.3 ± 1.4                                      | 8.7 ± 1.9                              |
| <i>Serratia</i> sp.<br>(Log <sub>10</sub> CFU g <sup>-1</sup> )          | < 2.0     | < 2.0     | 9.4 ± 1.8                                      | 9.3 ± 2.2                              |
| <i>Kosakonia</i> sp<br>Log <sub>10</sub> CFU g <sup>-1</sup>             | < 2.0     | < 2.0     | 8.6 ± 1.2                                      | 10.9 ± 1.4                             |
| <b>Proximate analysis</b>                                                |           |           |                                                |                                        |
| Yield (%)                                                                | -         | 53 ± 2    | 53 ± 2                                         | 53 ± 2                                 |
| Moisture (%)                                                             | 10 ± 2    | 0.1 0.02  | 63 ± 3                                         | 61 ± 2                                 |
| Volatile Carbon (%)                                                      | 85 ± 5    | 72 ± 4    | 81 ± 2                                         | 82 ± 5                                 |
| Fixed Carbon (%)                                                         | 12 ± 2    | 25 ± 3    | 17 ± 2                                         | 16 ± 4                                 |
| Ash (%)                                                                  | 1.2 ± 0.6 | 2.9 ± 0.9 | 1.3 ± 0.3                                      | 1.9 ± 0.4                              |
| <b>Element analysis</b>                                                  |           |           |                                                |                                        |
| C                                                                        | 44.5      | 87        | 54.7                                           | 53                                     |
| O                                                                        | 50.8      | 12.5      | 32.8                                           | 33.5                                   |
| H                                                                        | 4.7       | 0.5       | 12.5                                           | 13.5                                   |
| Molar H/C ratio                                                          | 0.105     | 0.0057    | 0.22                                           | 0.254                                  |
| Molar O/C ratio                                                          | 1.14      | 0.143     | 0.59                                           | 0.63                                   |

<https://doi.org/10.1371/journal.pone.0217100.t002>

CFU g<sup>-1</sup>, demonstrating formulation did not affect any bacteria conforming the phosphate solubilizing bacteria consortium (Table 2).

Proximate analysis results are presented in Table 2. BC yield did not change during formulation process, since it wasn't submitted to any additional treatment, thus it remained at 53%. Moisture and volatile fractions increased with respect to BC/PSB/I, with percentages of 63 and 61, respectively and 81 and 82% for BC/PSB/SC. Increase was associated with moist PSB during the formulation process. In contrast, BC/PSB/I in comparison to BC without PSB, fixed fraction and ash content slightly decreased. For BC/PSB/I and BC/PSB/SC results were for fixed fraction 17% and 16%. For ash were 1.3% and 1.9%, respectively. Carbon element for BC300/PSB/I and BC300/PSB/SC decreased (54.7 and 53%, respectively) with respect to BC300 without PSB. Biochar acquired water under the aqueous base formulation process, resulting in greater proportion of H and O, as supported by H/O and C/O molar ratios, which were increased above 0.2, demonstrating a greater presence of polar groups and greater water content (Table 2).

Raw matter was an LCB heterogeneous moist mix with different degrees of transformation and *P. ostreatus* mycelia (areas of white color of cotton-like texture Fig 4A). Raw matter SEM

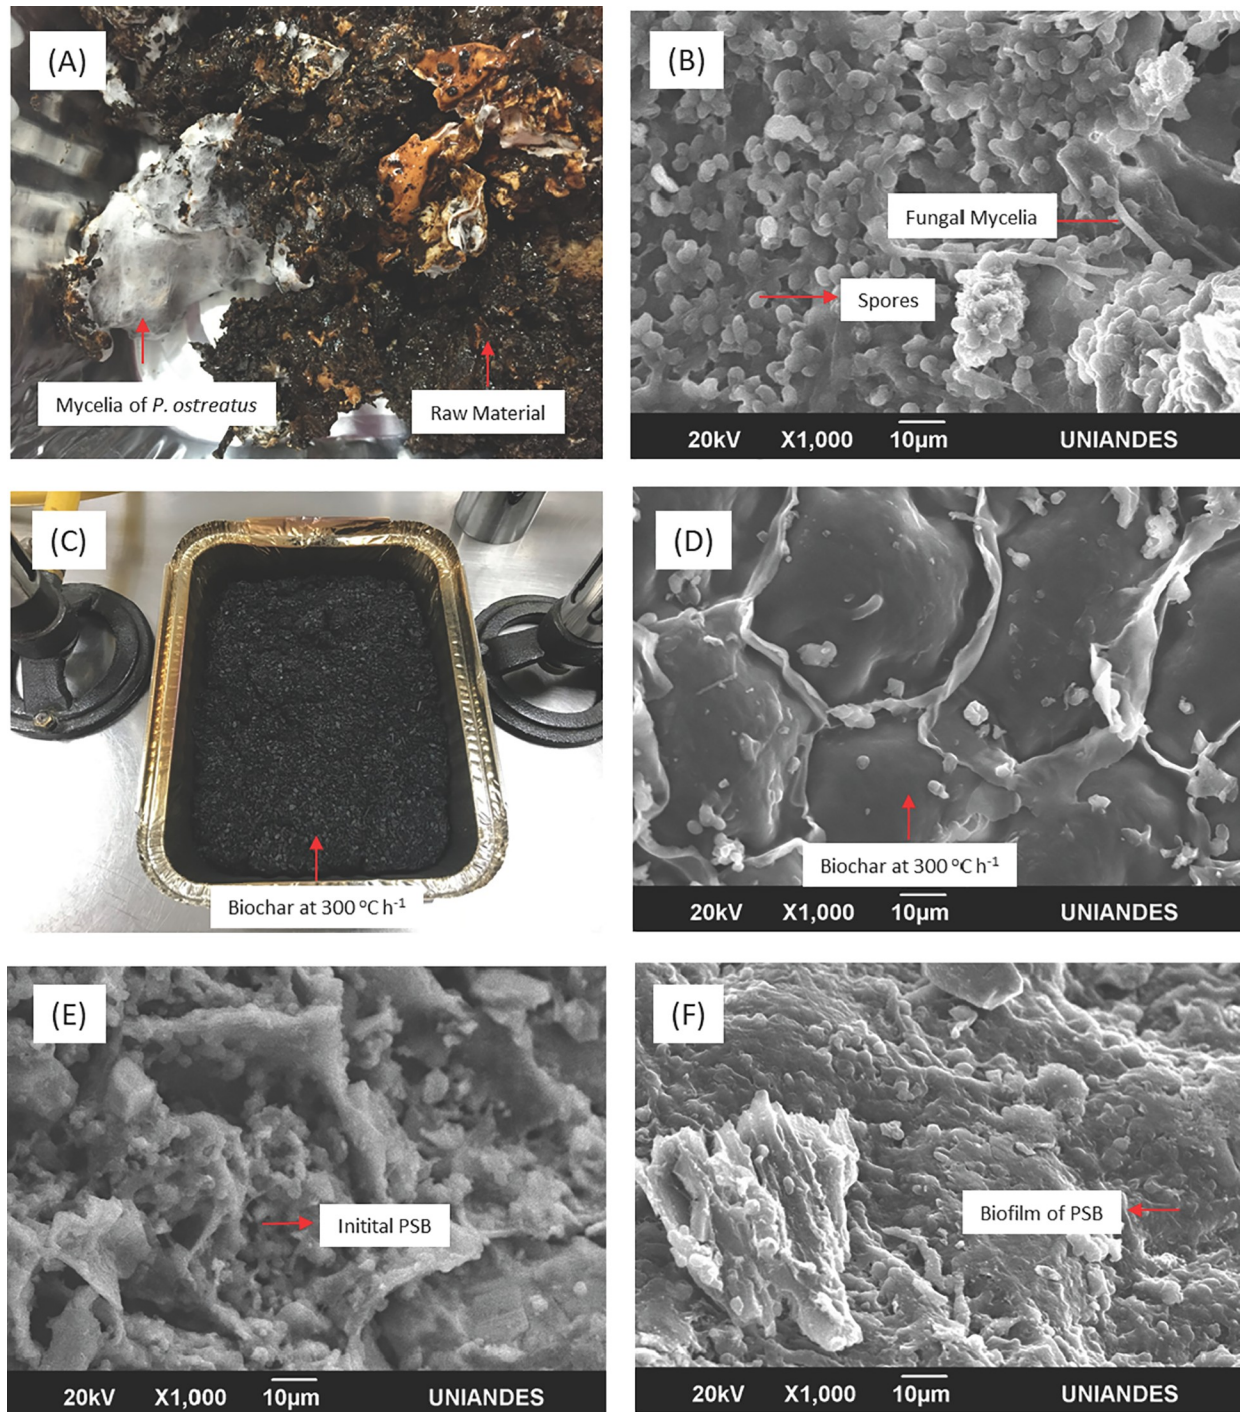

**Fig 4. LCB and pretreated LDPE<sub>oxo</sub> in microcosm.** (A) RM. (B) RM SEM at 1000 x. (C) BC (D) SEM of BC. (E). BC/PSB/I. (F) BC/PSB/SC.

<https://doi.org/10.1371/journal.pone.0217100.g004>

image analysis revealed *P. ostreatus*' thin hyphae and sphere-shaped spores (Fig 4B). Upon BC production a more homogenous product was obtained, of black color and thick texture (Fig 4C). Smooth surface, panel-like structures with mycelia fragments or cell debris were observed on BC/PSB/I SEM images following 300°C treatment (Fig 4D). For BC300/PSB/SC formation

**Table 3. Biochar and soil effect on *Allium cepa* growth.** Greenhouse results of *Allium cepa* seed growth for five weeks under greenhouse conditions with different biochar concentrations and soil.

| Code | Treatments                 | pH                     | Log <sub>10</sub> CFU g <sup>-1</sup> | Fresh weight (mg)       | Height (cm)            |
|------|----------------------------|------------------------|---------------------------------------|-------------------------|------------------------|
| 1    | BC 1% (w/v) + PSB+ Soil    | 6.4 ± 0.1 <sup>c</sup> | 8.3 ± 0.2 <sup>a</sup>                | 35 ± 3.5 <sup>b</sup>   | 6.1 ± 0.3 <sup>b</sup> |
| 2    | BC 2% (w/v) + PSB+ Soil    | 6.3 ± 0.2 <sup>c</sup> | 8.1 ± 0.2 <sup>a</sup>                | 38 ± 1 <sup>b</sup>     | 7.8 ± 0.3 <sup>b</sup> |
| 3    | BC 5% (w/v) + PSB+ Soil    | 6.7 ± 0.6 <sup>c</sup> | 8.1 ± 0.8 <sup>a</sup>                | 58 ± 1 <sup>a</sup>     | 12 ± 0.4 <sup>a</sup>  |
| C1   | 100% soil                  | 5.2 ± 0.2 <sup>d</sup> | 5.4 ± 1.2 <sup>c</sup>                | 18.4 ± 4.9 <sup>d</sup> | 3.9 ± 0.2 <sup>d</sup> |
| C2   | BC at 100% (w/v) + PSB     | 8.0 ± 0.1 <sup>a</sup> | 6.8 ± 0.2 <sup>b</sup>                | 25.7 ± 1.5 <sup>c</sup> | 5.7 ± 0.6 <sup>c</sup> |
| C3   | PSB only                   | 7.0 ± 0.1 <sup>b</sup> | 5.1 ± 0.1 <sup>c</sup>                | 21.3 ± 6 <sup>c</sup>   | 4.2 ± 0.3 <sup>d</sup> |
| C4   | BC at 100% (w/v) w/out PSB | 6.6 ± 0.1 <sup>c</sup> | 2.0 ± 0.1 <sup>e</sup>                | 9.3 ± 2.9 <sup>e</sup>  | 3.1 ± 0.5 <sup>e</sup> |

Means in a column followed by the same letter are not significantly different at  $p \leq 0.05$  by LSD, different letters mean statistical differences.

<https://doi.org/10.1371/journal.pone.0217100.t003>

of a uniform biofilm on BC's surface was observed, which could be associated with bacteria growth after 24 h incubation at 30°C (Fig 4E and 4D).

### *Allium cepa* greenhouse growth assay

*A. cepa* growth (cm) and weight (mg) was favored by adding BC enriched with PSB, where the best treatment was T3 (5% BC enriched with PSB). After five weeks of evaluation height was 12 cm and weight 58 mg ( $p = 0.0010$  and  $p = 0.0023$ ). In contrast, T2 results were 7.8 cm and 38 mg and T1 6.1 cm and 35 mg. Observed results for controls (C1: only soil, C2: BC with PSB without soil, C3: only PSB, and C4: PSB without soil) were all lower compared with treatments (Table 3), thus demonstrating BC supplementation with PSB to soil could be a strategy enhancing *A. cepa* plant growth.

## Discussion

### Simultaneous LCB and plasma treated LDPE<sub>oxo</sub> biotransformation in microcosm systems

Incineration on landfill disposal has been for a long time the route for plastic residue disposal, such as LPDE. Incineration emits into the atmosphere toxic gases (CO<sub>x</sub>, NO<sub>x</sub>, SO<sub>x</sub>), increasing the greenhouse effect. In landfills, in layers below the cover vegetation and top soil, polymers biodegrade very slowly, due to oxygen and moisture restrictions. Biodegradation under anaerobic conditions produces CH<sub>4</sub> (methane), a more potent gas compared with CO<sub>2</sub>, further increasing the greenhouse effect [53].

Another alternative for LDPE<sub>oxo</sub> disposal and use of waste is to integrate it with other biotransformation technologies, such as industrial composting conditions (high temperatures, high moisture and oxygen levels), soil remediation and bioreactor (microcosm) use for solid LCB fermentation [5,53]; substantially differing from conventional practices including incineration and landfill disposal [17,52]. Because it is an aerobic process, degradation is faster, complete, and generates CO<sub>2</sub> and biomass (living cells), [53]. Simultaneous treatment of LCB and plasma treated LDPE<sub>oxo</sub> is a complex process, given chemical nature of both types of residues. However, if physical and chemical conditions are adjusted assisted by *P. ostreatus* biotransformation, it is possible to attain simultaneous transformation, without implying modifications at the same rate, and efficiencies, unless complete mineralization to CO<sub>2</sub> is achieved [52,54].

Based on microcosm level obtained results *P. ostreatus* gradually biotransformed LCB under mesophilic aerobic conditions for 75 days. Among the intrinsic conditions evaluated,

moisture percentage was not a biotransformation parameter. However, it was a critical variable to be controlled, since it determined substrate hydration, which helps to regulate oxygen content within the solid matrix, supporting mycelia growth and material's surface colonization during the first days [55].

In the present study initial moisture for treatment and controls was low, never the less by progressive nutrient supplementation it was possible to adjust moisture percentage improving TM1 up to 80% and CM1 to 79% at day 30. Later they diminished to end with values reported for *P. ostreatus*' solid culture (50–75%), and different filling mixtures in composting processes degradation (60%), [24,55]. Additionally, *P. ostreatus* growth within TM1 and CM1 microcosms, also contributed to an increase in moisture percentage, since water can represent up to 50% of the fungus weight [55]. In contrast, no increase in moisture percentage was observed for controls without *P. ostreatus*, since they were only hydrated with nutrient solution and the quantity added was too low to generate an equal or higher percent in comparison with TM1 and CM1 (Fig 1A).

To initiate microcosms utilized material (PB+CPN+BYH) had different pH values: PB ( $5.5 \pm 0.2$ ), CPN ( $7.0 \pm 0.2$ ) and BYH ( $5.9 \pm 0.2$ ). Mix preparation gave an initial value below  $6.5 \pm 0.2$ , because PB and BYH had a greater initial influence on pH regulation, benefiting growth and *P. ostreatus* enzyme activity [18,55,56]. In regard to microcosm's pH containing *P. ostreatus* biomass, pH reduction was associated with organic acid production given simple carbon sources, such as glucose, as well as cellulose's and hemicellulose's homo- and hetero-glycans [18,56]. During the last days of sampling pH increased to a value closer to the initial days, which could be accounted by ammonium production and volatilization because of BYH organic nitrogen source metabolism. It is known *P. ostreatus* can employ different sources of organic and inorganic nitrogen, where ammonium results as a product from the process of biotransformation in compost and edible mushrooms (Fig 1B), [24,55].

Progressive CO<sub>2</sub> emission rate increase in TM1 and CM1, indicated biotransformation initiated at the expense of more easily biodegraded materials, *i.e.* paper napkin cellulose, glucose in nutrient solution, and carbon as part of the yeast hydrolysate. Because it is chemically less complex than PB, these compounds are the first to be hydrolyzed and used for mycelial growth, as was evidenced by an extensive hyphae network at the surface of the microcosm during the first days of the process. Toilet paper has been used as the carbon source to induce extracellular enzyme production and as initial fungal growth [27]. Our results are similar, since adding LDPE<sub>oxo</sub> to LCB resulted in increased CO<sub>2</sub> emission rate production. This was demonstrated with CM1 control composed of LCB and *P. ostreatus* biomass without any LDPE<sub>oxo</sub> sheets, with significantly less production ( $p = 0.015$ ), (Fig 1C). Quantified CO<sub>2</sub> emission rate in CM3 and CM4 controls could be attributed to abiotic hydrolytic processes or by its accompanying microbiota. Other authors have also reported CO<sub>2</sub> abiotic production. Some authors inoculated *Geobacillus* spp., in compost with plastic for 90 days, and observed absolute control had lower CO<sub>2</sub> production in comparison with treatments [52].

Statistical analysis demonstrated CO<sub>2</sub> emission rate production was negatively correlated with TOC percentage, as CO<sub>2</sub> emission rate concentration increased and TOC percentage decreased ( $\rho = -0.85$ ,  $p < 0.026$  and  $\rho = -0.81$ ,  $p < 0.015$ ). However, for this variable two phases were detected. During the first 15 days a slow decrease was observed, suggesting LCB's more stable fraction was unhydrolyzed (PB: lignin, cellulose and hemicellulose). Up to that time point certain fractions of total lignin had initiated depolymerization, in addition to bond hydrolysis among PB's structural polymers. TOC percentage decrease was more evident for TM1 after 30 days, likely due to alternations between labile (CPN, BYH and glucose) and stable carbon fraction biotransformation processes, once the delignification had initiated (Fig 1D), [18]. An appropriate C/N ratio is fundamental for this to take place, considering *P. ostreatus*

requires available nitrogen to oxidize carbon fractions. For TM1, addition of CPN and BYH adjusted initial C/N ratio to 50/1. After 75 days of the process this ratio was reduced to 42% (TM1) and 21% (CM1), (Fig 1D). Even though, percentage reduction in C/N ratio were not high, results revealed biotransformation was carried out from C/N ratio, and solid fermentation could be prolonged in the microcosm.

Author's suggest that using highly lignified materials in combination with other more biodegradable agroindustrial residues requires longer processing times for the C/N ratio to decrease below 15. Moreover, they can be considered as soil conditioners with a high degree of maturity [24,55,57]. Several authors also evaluated the effect of different waste materials to balance C/N ratio and increase biodegradability of forest residues in combination with plastic. In their "in vitro" study RM (36% (w/v) vegetable residues, 20% (w/v) rice, 29% (w/v) mature compost, 13% (w/v) sawdust as a bulking agent, and 2% (w/v) paper) were fermented with LDPE sheets and inoculated with *A. fumigatus*, *A. terreus* and *F. solani*. Under evaluated experimental conditions after 100 days of fermentation, these fungi decreased TOC by 42.31%, 21.2% and 8.13% respectively. Additionally, changes in LDPE sheets were evidenced suggesting biodegradation took place under solid fermentation conditions [19,57].

Other results that aid supporting different LCB carbon fractions (labile and stable) biotransformation were soluble lignin concentration and E4/E6 polymerization ratio. *P. ostreatus* lignin concentration was detected in TM1 at day 45 (28 mg Kg<sup>-1</sup>). This result supports the hypothesis that *P. ostreatus* first used more simple carbon sources, and on lignin it probably only carried-out modifications mediated by lignolytic enzymes that could be associated with partial oxidations of phenyl-propane, demethylations and hydrolysis of aliphatic chains [18,58–60]. Once depolymerization took place, PB delignification was evident, since soluble lignin concentration increased after 45 days and ended at day 75 with 153 and 90 mg Kg<sup>-1</sup> for TM1 and CM1 respectively (Fig 1E).

For TM1 and CM1 E4/E6 polymerization level determination for the first 30 days, values were between 2.8 and 3.1, suggesting compounds with different degrees of aromaticity and aliphatic compounds were present (Fig 1F). Additionally, values below 1.0 could be associated with fractions with greater level of aromaticity and more condensed, such as humic and fulvic acids, indicators of a humus production process [61–63]. These results suggest that for TM1 and CM1 microcosms humus production process took place. High E4/E6 ratio during the early stages of organic matter degradation in soils of different uses, such as forests and coffee plantations [64], as that observed in this work at day 0 were observed. Moreover, in a caprine manure and shea-nut cake composting assay an E4/E6 ratio decrease from 4 to 2.68 in moist organic matter was observed [65]. The same behavior in pine sawdust compost has been observed, attributed to an increase in the number of condensed unsaturated aromatic rings, indicators of OM stabilization [66].

Lignolytic enzymes actively participated in LCB biotransformation process, yet their activity was distinct for each enzyme. During the entire process the enzyme with highest activity was LiP, since it is the first enzyme to initiate lignin modification given its superior redox potential compared with Lac (E0 = 1.2 V vs., 0.8 V, respectively). LiP can randomly oxidize the polymer's phenolic and non-phenolic fractions (Fig 1G and 1H). Additionally, this enzyme can open aromatic rings to generate intermediate aliphatic structures (tricarboxylic acids) that are rapidly used for energy production [67].

Compared to Lac, MnP had a similar redox potential (0.8 V). However, in contrast to Lac as long as there is Mn<sup>2+</sup> in the media, supplemented in nutrient solution, it can oxidize lignin aromatic and non-aromatic fractions (Fig 1G and 1H). According to several authors, under these conditions MnP can produce peroxy and acyl type free radicals (low specificity



intermediaries) that play a complementary role in lignin's non-aromatic fraction oxidation [67,68].

Last, Lac activity was detected in TM1 treatment and its CM1 control. Nevertheless, TM1 activity was higher, demonstrating joint addition of LCB, ABTS redox mediator and plasma treated LDPE<sub>oxo</sub> sheets could potentiate Lac activity (Fig 1G and 1H), [6,18,22,68,69].

LCB biotransformation and plasma treated LDPE<sub>oxo</sub> could have taken place by combined action or synergy of a group of oxidative enzymes (ligninases) and hydrolytic enzymes (cellulases and hemicellulases), acting through a co-metabolic process, not only degrading their target substrates (lignin, cellulose and hemicellulose), but LDPE<sub>oxo</sub> anthropomorphic generated contaminating compound, profiting on lignolytic enzyme low specificity [4,6,27,70]. In this work, addition of CPN as a carbon source favored synthesis of lignocellulosic enzymes of lac-case type. Additionally, its action could have favored LDPE<sub>oxo</sub> biotransformation through co-metabolism. Lac activity on LDPE<sub>oxo</sub> has been reported when toilet paper was added as a co-substrate [27]. In addition, air was frequently administered to the microcosm system, promoting aerobic co-metabolism, which has as the following advantages: high degradation degree of an ample group of contaminants and low accumulation of toxic compounds [71].

Concerning plasma treated LDPE<sub>oxo</sub> sheets, the most important change observed was TM1's SCA decrease. In comparison with pristine LDPE a 72° decrease was observed, i.e. an 84% gain in hydrophilicity. This result reveals the synergistic effect plasma discharge and fungus enzyme activity have on the material's oxidation. Additionally, it highlights microbial enzyme capacity to oxidize high molecular weight polymers, generating functional groups that increase hydrophilicity [72]. Moreover, if LDPE<sub>oxo</sub> is surrounded by a moist environment (close to 70%, as was observed in the microcosm), it maintains its hydrophilicity, since an aqueous environment has affinity for polar groups and forces them to remain on the surface [73].

For CM2 with a  $28 \pm 7^\circ$  SCA, a moderate recovery of post plasma hydrophobicity could have presented, allowing for non-oxidized low molecular weight chemical species to migrate from the material's bulk to the surface, making it slightly hydrophobic [26]. In the present work a 75% hydrophobicity recovery for non-oxobiodegradable LDPE sheets under plasma discharge was observed after seven days [6]. In this study, CM2 LDPE<sub>oxo</sub> sheet recovery was of 67% at day 75 (Table 1), suggesting employed microcosm maintained LDPE<sub>oxo</sub> post-plasma hydrophilicity, enhancing microorganism growth and colonization on the material's surface, thus its biotransformation.

*P. ostreatus* growth and colonization on plasma treated LDPE<sub>oxo</sub> sheets was evidenced by an increase in the material's roughness [(13 ± 3) nm] compared with control, as was observed in AFM images and confirmed by SEM images. Fungi secrete chitin and glycan facilitating adhesion to polyethylene surface, as well as hydrophobins that form a hydrophobic-hydrophobic interphase, aiding in hyphae penetration and mycelial network growth [6], thus increasing roughness. *P. ostreatus* capacity to grow on LDPE<sub>oxo</sub> generating grooves, cracks and holes on polyethylene's surface, due to mechanical action of hyphae apices has been described [6,27,74]. In the present work no cracks or grooves were observed on SEM images that would allow to evidence fungus mechanical action.

FTIR results revealed plasma treated LDPE<sub>oxo</sub> biotransformation (Fig 3), where signals corresponding to C-O ( $1,076 \text{ cm}^{-1}$ ) and C-OH ( $3,271 \text{ cm}^{-1}$ ) bonds suggested material's oxidation. Furthermore, variations in the signal at  $2,928 \text{ cm}^{-1}$ ,  $2,848 \text{ cm}^{-1}$  are associated with loss of mass [75]. During the 90-day process of LDPE<sub>oxo</sub> biotransformation with TiO<sub>2</sub> as a peroxidation promoting agent and *P. ostreatus*, signals at  $3,500\text{--}3,000 \text{ cm}^{-1}$  corresponding to hydroxyl (C-OH) group were described before [27], as observed in the present work. Presence of polar

groups favored LDPE<sub>oxo</sub> hydrophilicity (Table 1), [42,74], which allowed *P. ostreatus* to use the polymer as a substrate, and colonize it (Fig 2C and 2D).

In one study authors identified in LDPE<sub>oxo</sub> treated with TiO<sub>2</sub>, UV radiation and heat functional, aldehyde groups (CHO, 1725 cm<sup>-1</sup>), ketones (C = O, 1715 cm<sup>-1</sup>) and carboxylic acids (COOH, 1,710 cm<sup>-1</sup>), [76]. In this study, a group of signals of difficult interpretation was observed on the 1,700–1,750 cm<sup>-1</sup> regions of FTIR results (Fig 3) that could be associated with the aforementioned functional groups. Signal on 875 cm<sup>-1</sup> correspond to ether or peroxide bonds. Presence of such band has been described after LDPE<sub>oxo</sub> incubation with *P. ostreatus* for 45 days [77,78].

A decrease in TM1's I<sub>co</sub> value was associated with loss of the C = O and C-O bonds [50], depicting the fungus assimilation for these functional groups (Table 1). Peroxidases generated free radicals on the PEBD chain, which can attack the plastic's carbonated chains resulting in low molecular weight oxidized products, such a COOH, C-OH and C = O [50]. In this sense, *P. ostreatus* could have consumed these low molecular weight products, evidenced by decreased I<sub>co</sub> value. I<sub>co</sub> value decrease, suggesting microbial attack of oxidized chains, where C = O groups become transformed into C = OOH, after β-oxidation metabolism [79].

## Biochar production

The bio-product obtained from all fermentations carried out in microcosms at day 75 was converted into RM for BC production at 300°C/1h. Thermal transformation accounted for water, oxygen, nitrogen and carbon loss by volatilization, yet stable carbon or fixed fraction was concentrated. At 300°C moisture is lost and lignocellulose suffers thermal depolymerization processes, producing a carbon matrix with different degrees of aromaticity [80]. These results were associated with H/O and O/C ratios, which were low and suggested during thermal treatment water and oxygen were eliminated, and stable aromatic carbon was favored. Additionally, low O/C ratios also suggest BC surface was less polar than RM and tended to be less hydrophilic [81]. BC texture was porous, had greater surface contact and more homogenous particle size than RM. It has been reported that biomass thermal treatment can induce micro- and macro-pore formation, which is advantageous for microorganism colonization [82]. BC's bee-hive like structure was characterized by SEM observations, which was formed at these temperatures when pine residues are employed, as has been demonstrated by using PB to produce BC at different temperatures. In their work they evidenced a bee-hive like structure, when BC was produced at 300°C under reduced oxygen conditions [80].

Following BC production, it was enriched with PSB here known as BC/PSB/I and its respective secondary culture (BC/PSB/SC). Despite BC's low hydrophilicity, it was successfully moistened with the liquid biofertilizer, resulting in an increase in moisture percentage, organic matter and organic carbon content, which were contributed by bacterial liquid culture (Table 2) leading to an 81% increase in volatile carbon. On the contrary, fixed carbon decreased as a result of supplementation with other compounds rich in nitrogen and carbon, not associated with aromatic and amorphous carbon formed at 300°C.

An important result was obtained from element analysis, where an increase in hydrogen and oxygen content was observed, due to BC hydration. Therefore, molar ratios were starkly increased and solid biofertilizer became more hydrophilic. Furthermore, BC's physical characteristics (hydrophilic surface, bee-hive structure, and micro- and macro-pore) allowed for an elevated PSB number to be immobilized (9.5 Log<sub>10</sub> CFU g<sup>-1</sup>). No adverse effect was observed of BC on PSB. Moreover, when secondary culture was carried out an increase in approximately one logarithmic unit was observed. Additionally, during formulation process none of the morphotypes were eliminated.

*A. cepa* plants seeded at low doses on BC/PSB/SC (T1, T2 and T3), had greater plant biomass compared with those seeded on other substrates. Plant's weights and heights were significantly higher at 5% BC + PSB ( $p = 0.0010$  and  $p = 0.0023$ ), followed by 2% and 1%, respectively.

Biochar's properties as a microbial carrier were demonstrated by BC/PSB high PSB populations, microorganism biofilm arrangement on the biomaterial, and bacteria recovery from the substrate used for plant seeding in treatments including the biofertilizer. It is known adding PSB to different organic materials has an effect on bacterial community composition, phosphorous fractions, and organic acids produced [83]. *Kosakonia* sp., *Pseudomonas* sp., and *Serratia* sp., have the capacity to produce low molecular organic acids, such as oxalic and citric acid [84] that solubilize nutrients like P, Ca and K from diverse materials, protonate BC's surface and decrease solubilized cation retention capacity, allowing *A. cepa* to acquire them from the substrate's liquid phase. Several authors affirmed nutrients such as  $\text{Ca}^{2+}$ , K and  $\text{Mg}^{2+}$ , contained within bacterial culture or obtained as an organic nitrogen source product from bacteria metabolism, remain in the biofertilizer's aqueous phase, and along with C and BC stimulate microorganism metabolism of different functional groups from the soil, which are then mixed with BC300 [85,86]. In the present study BYH was the organic nitrogen source. These nutrients can also be taken up by the onion's root system.

In contrast to obtained materials at higher temperatures, BC roughness and hydrophilicity did not favor enzyme retention, such as phosphatases or  $\beta$ -glucosidases [87]. Therefore, nutrient mobility was augmented resulting in greater *Allium cepa* biomass, because of soil's microbiota stimulation and PSB present in BC (BC/PSB). BC/PSB at low doses and soil mixture results on plant growth are worth highlighting, as they did not reduce priming effect reported by other authors [87]. On the contrary, it accounted for differences in plant growth between treatments and controls, as it supplied nutrients contained in OM as well as bacterial culture including rock phosphate (32% CaO), nitrates ( $0.2 \text{ mg L}^{-1}$ ), extractable phosphorus ( $209 \text{ mg L}^{-1}$ ) and water soluble phosphorus ( $41 \text{ mg L}^{-1}$ ), [30,81,82].

Obtained results are important to help diminish the impact industrial activities have on the environment. The Holy Father Pope Francis in his encyclical letter "LAUDATO SI on care of our common home" (Chapter 1, No. 22) recognizes there is a "greater sensibility towards the environment and to protect nature, in addition to a growing concern for what is happening to our planet". He makes reference the "throwaway culture" is a main problem associated with present planet contamination, and proposes to adopt a circular model of production to preserve resources, limit use of non-renewable resources, moderate consumption, in order to maximize efficiency of preservation by reusing and recycling.

Regarding resource preservation and reutilization the present work, results are an example of a circular production model at laboratory scale, since they integrate organic matter solid residue bioconversion from plant, brewer and service residues (plastics and napkins). By employing a lignolytic fungus *P. ostreatus* bioproducts were obtained with value added in comparison with raw material (Partially oxidized lignocellulosic biomass, biotransformed plastic) and  $\text{CO}_2$  captured with carbon dioxide trap.

The most abundant bioproduct obtained from these experiments was thermally transformed to obtain biochar, with physical and chemical properties and possible beneficial properties for soil, aiding in contaminant stabilization and carbon sequestration. Thus, enriching soil by providing sources of carbon and nutrients, retaining water, and reinforcing the soil's microbial and enzyme activities.

Adding up all the benefits biochar by itself provides, it must be highlighted the biomaterial was enriched with PSB, which was evaluated at greenhouse scale on lettuce growth.

Development of this fertilizer was twofold, first to biotransform agroindustrial residues, and second it could be used as a biological fertilizer.

## Conclusions

*P. ostreatus* under mesophilic and aerobic conditions at microcosm scale is promising for LCB and plasma treated LDPE<sub>oxo</sub> simultaneous treatment. The designed system favored *P. ostreatus* growth, as it integrated a composition rich in lignocellulosic matter, substrate for the fungus' lignolytic enzymes. In particular, LiP presented the highest enzyme activity at day 75, assisting in plasma treated LDPE<sub>oxo</sub> sheet biotransformation. Both residues biotransformation was possible due to co-metabolism between substrates, influenced by lignolytic enzyme and biomass production. One obtained bioproduct was converted into a substrate for PSB immobilization, demonstrating a potential use as a solid organic biofertilizer.

## Supporting information

**S1 Supplementary Material. 2<sup>3</sup> factorial design with three centrals points.**  
(DOCX)

**S1 Table. 2<sup>3</sup> factorial design with three central points for microcosm system filling mixture selection.**  
(DOCX)

**S2 Table. Biomass colonization (%), Total Organic Carbon and Organic Matter 2<sup>3</sup> factorial Design response variables (ANOVA).**  
(DOCX)

**S3 Table. Enzymatic activities 2<sup>3</sup> factorial design response variables (ANOVA).**  
(DOCX)

**S4 Table. 2<sup>3</sup> factorial design results for microcosm filling mixture selection.**  
(DOCX)

## Acknowledgments

Authors thank María Lucía Gutiérrez Ph.D. for English editing.

## Author Contributions

**Conceptualization:** Raúl A. Poutou-Piñales, Juan C. Salcedo-Reyes, Lucía A. Díaz-Ariza, Aura M. Pedroza-Rodríguez.

**Funding acquisition:** Laura C. Castillo-Carvajal, Aura M. Pedroza-Rodríguez.

**Investigation:** Diana A. Moreno-Bayona, Luis D. Gómez-Méndez, Andrea Blanco-Vargas, Alejandra Castillo-Toro, Laura Herrera-Carlosama, Laura C. Castillo-Carvajal, Naydú S. Rojas-Higuera.

**Project administration:** Aura M. Pedroza-Rodríguez.

**Writing – original draft:** Diana A. Moreno-Bayona, Luis D. Gómez-Méndez.

**Writing – review & editing:** Raúl A. Poutou-Piñales, Aura M. Pedroza-Rodríguez.

## References

1. Yang X, Choi HS, Park C, Kim SW (2015) Current states and prospects of organic waste utilization for biorefineries. *Renewable and Sustainable Energy Reviews* 49: 335–349. <http://dx.doi.org/10.1016/j.rser.2015.04.114>.
2. ElMekawy A, Srikanth S, Bajracharya S, Hegab HM, Nigam PS, Singh A, et al. (2015) Food and agricultural wastes as substrates for bioelectrochemical system (BES): The synchronized recovery of sustainable energy and waste treatment. *Food Research International* 73: 213–225.
3. Makarichi L, Jutidamrongphan W, Techato K (2018) The evolution of waste-to-energy incineration: A review. *Renewable and Sustainable Energy Reviews* 91: 812–821. <http://doi.org/10.1016/j.rser.2018.04.088>.
4. Rojas-Higuera NS, Pava-Sánchez AM, Pinzón Rangel DL, Díaz-Ariza LA, Quevedo-HidalgoBalkys, Pedroza-rodríguez AM(2017) Bio-transformed sawdust by white rot fungi used as a carrier for plant growth-promoting bacteria. *European Journal of Wood Product* 75: 263–273. <http://dx.doi.org/10.1007/s00107-016-1099-x>.
5. Kasirajan S, Ngouajio M (2012) Polyethylene and biodegradable mulches for agricultural applications: a review. *Agronomy for Sustainable Development* 32: 501–529. <http://dx.doi.org/10.1007/s13593-011-0068-3>.
6. Gómez-Méndez LD, Moreno-Bayona DA, Poutou-Piñales RA, Salcedo-Reyes JC, Pedroza-Rodríguez AM, Vargas A, et al. (2018) Biodeterioration of plasma pretreated LDPE sheets by *Pleurotus ostreatus*. *Plos One* 13: e0203786. <https://doi.org/10.1371/journal.pone.0203786> PMID: 30212510
7. Ojeda TFM, Dalmolin E, Forte MMC, Jacques RJS, Bento FM, Camargo FAO (2009) Abiotic and biotic degradation of oxo-biodegradable polyethylenes. *Polymer Degradation and Stability* 94: 965–970. <http://dx.doi.org/10.1016/j.polymdegradstab.2009.03.011>.
8. Barnes DKA, Galgani F, Thompson RC, Barlaz M (2009) Accumulation and fragmentation of plastic debris in global environments. *Philosophical Transactions of The Royal Society Biological Sciences B* 364: 1985–1998. <http://dx.doi.org/10.1098/rstb.2008.0205>.
9. Sen SK, Raut S (2015) Microbial degradation of low density polyethylene (LDPE): A review. *Journal of Environmental Chemical Engineering* 3: 462–473. <http://dx.doi.org/10.1016/j.jece.2015.01.003>.
10. Eyheraguibel B, Traikia M, Fontanella S, Sancelme M, Bonhomme S, Fromageot D, et al. (2017) Characterization of oxidized oligomers from polyethylene films by mass spectrometry and NMR spectroscopy before and after biodegradation by a *Rhodococcus rhodochrous* strain. *Chemosphere* 184: 366–374. <https://doi.org/10.1016/j.chemosphere.2017.05.137> PMID: 28605707
11. Forster-Carneiro T, Berni MD, Dorileo IL, Rostagno MA (2013) Biorefinery study of availability of agriculture residues and wastes for integrated biorefineries in Brazil. *Resources, Conservation and Recycling* 77: 78–88. <http://dx.doi.org/10.1016/j.resconrec.2013.05.007>.
12. Moya D, Aldás C, López G, Kaparaju P (2017) Municipal solid waste as a valuable renewable energy resource: a worldwide opportunity of energy recovery by using Waste-To- Energy Technologies. *Energy Procedia* 134: 286–295. <http://dx.doi.org/10.1016/j.egypro.2017.09.618>.
13. Seidl PR, Goulart AK (2016) Pretreatment processes for lignocellulosic biomass conversion to biofuels and bioproducts. *Current Opinion in Green and Sustainable Chemistry* 2: 48–53. <http://dx.doi.org/10.1016/j.cogsc.2016.09.003>.
14. Li X, Zheng Y (2017) Lignin-enzyme interaction: Mechanism, mitigation approach, modeling, and research prospects. *Biotechnology Advances* 35: 466–489. <https://doi.org/10.1016/j.biotechadv.2017.03.010> PMID: 28351654
15. Dang TCH, Nguyen DT, Thai H, Nguyen TC, Tran TTH, Le VH, et al. (2018) Plastic degradation by thermophilic *Bacillus* sp. BCBT21 isolated from composting agricultural residual in Vietnam. *Advances in Natural Sciences: Nanoscience and Nanotechnology* 9: 015014. <http://doi.org/10.1088/2043-6254/aaabaf>.
16. Esmaeili A, Pourbabaee AA, Alikhani HA, Shabani F, Esmaeili E (2013) Biodegradation of low-density polyethylene (LDPE) by mixed culture of *Lysinibacillus xylanilyticus* and *Aspergillus niger* in Soil. *Plos One* 8: e71720. <https://doi.org/10.1371/journal.pone.0071720> PMID: 24086254
17. Vaverková M, Adamcová D, Kotovicov J, Toman F (2014) Evaluation of biodegradability of plastics bags in composting conditions. *Ecological Chemistry and Engineering* 21: 45–57. <http://dx.doi.org/10.13140/2.1.4548.0646>.
18. Wan C, Li Y (2012) Fungal pretreatment of lignocellulosic biomass. *Biotechnology Advances* 30: 1447–1457. <https://doi.org/10.1016/j.biotechadv.2012.03.003> PMID: 22433674
19. Zahra S, Abbas SS, Mahsa M-T, Mohsen N (2010) Biodegradation of low-density polyethylene (LDPE) by isolated fungi in solid waste medium. *Waste Management* 30: 396–401. <https://doi.org/10.1016/j.wasman.2009.09.027> PMID: 19919893

20. Schwarze FW (2007) Wood decay under the microscope. *Fungal Biology Reviews* 21: 133–170. <http://dx.doi.org/10.1016/j.fbr.2007.09.001>.
21. Hammel KE, Kapich AN, Jensen KA Jr., Ryan ZC (2002) Reactive oxygen species as agents of wood decay by fungi. *Enzyme and Microbial Technology* 30: 445–453.
22. Krueger MC, Harms H, Schlosser D (2015) Prospects for microbiological solutions to environmental pollution with plastics. *Applied Microbiology and Biotechnology* 99: 8857–8874. <https://doi.org/10.1007/s00253-015-6879-4> PMID: 26318446
23. Zhou C, Liu Z, Huang Z-L, Dong M, Yu X-L, Ning P (2015) A new strategy for co-composting dairy manure with rice straw: Addition of different inocula at three stages of composting. *Waste Management* 40: 38–43. <https://doi.org/10.1016/j.wasman.2015.03.016> PMID: 25837785
24. Zhang L, Sun X (2018) Influence of sugar beet pulp and paper waste as bulking agents on physical, chemical, and microbial properties during green waste composting. *Bioresource Technology* 267: 182–191. <https://doi.org/10.1016/j.biortech.2018.07.040> PMID: 30021150
25. Abou Rich S, Dufour T, Leroy P, Nittler L, Pireaux JJ, Reniers F (2014) Low-density polyethylene films treated by an atmospheric Ar-O<sub>2</sub> post-discharge: functionalization, etching, degradation and partial recovery of the native wettability. *Journal of Physics D: Applied Physics* 47: 1–12. <http://dx.doi.org/10.1088/0022-3727/47/6/065203>.
26. Mortazavi M, Nosonovsky M (2012) A model for diffusion-driven hydrophobic recovery in plasma treated polymers. *Applied Surface Science* 258: 6876–6883. <http://dx.doi.org/10.1016/j.apsusc.2012.03.122>.
27. Rodrigues da Luz JM, Albino Paes S, Dias Nunes M, Soares Bazzoli D, Tótola M, Demuner AJ, et al. (2014) Abiotic and biotic degradation of oxo-biodegradable plastic bags by *Pleurotus ostreatus*. *Plos One* 9: e107438. <https://doi.org/10.1371/journal.pone.0107438> PMID: 25419675
28. Venkata Mohan S, Rohit MV, Chiranjeevi P, Chandra R, Navaneeth B (2015) Heterotrophic microalgae cultivation to synergize biodiesel production with waste remediation: Progress and perspectives. *Biore-source Technology* 184: 169–178. <https://doi.org/10.1016/j.biortech.2014.10.056> PMID: 25497058
29. Siddiqui AR, Nazeer S, Piracha MA, Saleem MM, Siddiqi I, Shahzad SM, et al. (2016) The production of biochar and its possible effects on soil properties and phosphate solubilizing bacteria. *Journal of Applied Agriculture and Biotechnology* 1: 27–40.
30. Fox A, Kwapinski W, Griffiths BS, Schmalenberger A (2014) The role of sulfur- and phosphorus-mobilizing bacteria in biochar-induced growth promotion of *Lolium perenne*. *FEMS Microbiology Ecology* 90: 78–91. <https://doi.org/10.1111/1574-6941.12374> PMID: 24965962
31. Fatemeh B, Zaynab M (2015) Influence of Rooting Substrate and Cutting Type on Rooting of Cuttings in *Schefflera arboricola* L. *Plants. International Journal of Plant & Soil Science* 4: 281–287.
32. Ha HC, Honda Y, Watanabe T, Kuwahara M (2001) Production of manganese peroxidase by pellet culture of the lignin-degrading basidiomycete, *Pleurotus ostreatus*. *Applied Microbiology and Biotechnology* 55: 704–711. PMID: 11525618
33. Zhang J, Zhang J (2015) The filamentous fungal pellet and forces driving its formation. *Critical Review in Biotechnology* 36: 1066–1077. <http://dx.doi.org/10.3109/07388551.2015.1084262>.
34. Beiyuan J, Awad YM, Beckers F, Tsang DCW, Ok YS, Rinklebe J (2017) Mobility and phytoavailability of As and Pb in a contaminated soil using pine sawdust biochar under systematic change of redox conditions. *Chemosphere* 178: 110–118. <https://doi.org/10.1016/j.chemosphere.2017.03.022> PMID: 28319738
35. (ICONTEC ICdNT (2006) Productos para la industria agrícola. Productos orgánicos usados como abonos o fertilizantes y enmiendas de suelo (NTC 5167). Bogotá, D.C., Colombia. 40p p.
36. International A (2007) Standard Test Method for Chemical Analysis of Wood Charcoal (D1762-1784). 2 p.
37. Díaz-Ariza LA, Morales L, Beltrán J (2015) Proceso De Inmovilización De Bacterias Gram Negativas Para Estimular El Crecimiento Vegetal. Colombia.
38. Angulo-Cortés JP, García-Díaz A, Pedroza AM, Martínez-Salgado MM, Gutiérrez-Romero V (2012) Diseño de un medio para la producción de un co-cultivo de bacterias fosfato solubilizadoras con actividad fosfatasa. *Universitas Scientiarum* 17: 43–52.
39. Tinoco R, Pickard MA, Vazquez-Duhalt R (2001) Kinetic differences of purified laccases from six *Pleurotus ostreatus* strains. *Letters in Applied Microbiology* 32: 331–335. <http://dx.doi.org/10.1046/j.1472-765X.2001.00913.x>. PMID: 11328500.
40. Santoyo F, González AE, Terrón MC, Ramírez L, Pisabarro AG (2008) Quantitative linkage mapping of lignin-degrading enzymatic activities in *Pleurotus ostreatus*. *Enzyme and Microbial Technology* 43: 137–143. <http://dx.doi.org/10.1016/j.enzmictec.2007.11.007>.

41. Bourbonnais R, Paice MG (1988) Veratryl alcohol oxidases from the lignin-degrading basidiomycete *Pleurotus sajor-caju*. *Biochemical Journal* 255: 445–450. PMID: 3060110 <https://doi.org/10.1042/bj2550445>
42. Hetemi D, Médard J, Kanoufi F, Combellas C, Pinson J, Podvorica FI (2016) Surface modification of polymers by reaction of alkyl radicals. *Langmuir* 32: 512–518. <https://doi.org/10.1021/acs.langmuir.5b03669> PMID: 26653398
43. Jenkinson DS, Powlson DS (1976) The effects of biocidal treatments on metabolism in soil—V: A method for measuring soil biomass. *Soil Biology and Biochemistry* 8: 209–213.
44. Illinois Department of Transportation Central Bureau of Materials (2013) Determination of Organic Content in Soils by Loss on Ignition AASHTO T 267–86. Manual of Test Procedures for Materials. Springfield, Illinois: Illinois Department of Transportation Central Bureau of Materials. pp. 197–201.
45. Martínez M, Gutiérrez V, Pedroza A (2011) Métodos Microbiológicos, físicos y químicos con aplicación ambiental. Manual de Microbiología Ambiental. Valparaíso, Chile: Editorial Universidad Federico Lleras San María. 132p. p.
46. Helal AA, Murad GA, Helal AA (2011) Characterization of different humic materials by various analytical techniques. *Arabian Journal of Chemistry* 4: 51–54. <http://dx.doi.org/10.1016/j.arabjc.2010.06.018>.
47. Bremner JM (1996) Nitrogen-Total. *Methods of Soil Analysis Part 3-Chemical Method*: Soil Science Society of America, American Society of Agronomy. pp. 1085–1122.
48. Ataefard M, Moradian S, Mirabedini M, Ebrahimi M, Asiaban S (2008) Surface properties of low density polyethylene upon low-temperature plasma treatment with various gases. *Plasma Chemistry and Plasma Processing* 28: 377. <http://dx.doi.org/10.1007/s11090-008-9126-2>.
49. Gajendiran A, Krishnamoorthy S, Abraham J (2016) Microbial degradation of low-density polyethylene (LDPE) by *Aspergillus clavatus* strain JASK1 isolated from landfill soil. *3 Biotech* 6: 52. <https://doi.org/10.1007/s13205-016-0394-x> PMID: 28330123
50. Benítez A, Sánchez JJ, Arnal ML, Müller AJ, Rodríguez O, Morales G (2013) Abiotic degradation of LDPE and LLDPE formulated with a pro-oxidant additive. *Polymer Degradation and Stability* 98: 490–501. <http://doi.org/10.1016/j.polymdegradstab.2012.12.011>.
51. Martínez-Romo A, González-Mota R, Soto-Bernal JJ, Rosales-Candelas I (2015) Investigating the Degradability of HDPE, LDPE, PE-BIO, and PE-OXO Films under UV-B Radiation. *Journal of Spectroscopy* 2015: Article ID 586514. <https://doi.org/10.1155/2015/659473>
52. Castro-Aguirre E, Auras R, Selke S, Rubino M, Marsh T (2018) Enhancing the biodegradation rate of poly(lactic acid) films and PLA bio-nanocomposites in simulated composting through bioaugmentation. *Polymer Degradation and Stability* 154: 46–54. <http://doi.org/10.1016/j.polymdegradstab.2018.05.017>.
53. Ojeda T (2013) Polymers and the Environment. In: Yilmaz F, editor. *Polymer Science: INTECH*. pp. 1–35.
54. Kumar BM, Noobia S, Mythri S (2016) Studies on Biodegradation of Plastic Packaging Materials in Soil Bioreactor. *Indian Journal of Advances in Chemical Science* S1: 297–299.
55. Bellettini MB, Fiorda FA, Maieves HA, Teixeira GL, Ávila S, Hornung PS, et al. (2016) Factors affecting mushroom *Pleurotus* spp. *Saudi Journal of Biological Sciences* 26:633–646. <https://doi.org/10.1016/j.sjbs.2016.12.005> PMID: 31048986
56. Yoon LW, Ang TN, Ngoh GC, Chua ASM (2014) Fungal solid-state fermentation and various methods of enhancement in cellulase production. *Biomass and Bioenergy* 67: 319–338. <http://dx.doi.org/10.1016/j.biombioe.2014.05.013>.
57. Wei Y, Wu D, Wei D, Zhao Y, Wu J, Xie X, et al. (2019) Improved lignocellulose-degrading performance during straw composting from diverse sources with actinomycetes inoculation by regulating the key enzyme activities. *Bioresource Technology* 271: 66–74. <https://doi.org/10.1016/j.biortech.2018.09.081> PMID: 30265954
58. Hammel KE, Cullen D (2008) Role of fungal peroxidases in biological ligninolysis. *Current Opinion in Plant Biology* 11: 349–355. <https://doi.org/10.1016/j.pbi.2008.02.003> PMID: 18359268
59. Munk L, Sitarz A, Kalyani D, Dalgaard J, Meyer A (2015) Can laccases catalyze bond cleavage in lignin? *Biotechnology Advances* 33: 13–24. <https://doi.org/10.1016/j.biotechadv.2014.12.008> PMID: 25560931
60. Rivera-Hoyos CM, Morales-Álvarez ED, Poutou-Piñales RA, Pedroza-Rodríguez AM, Rodríguez-Vázquez R, Rodríguez-Vázquez R, et al. (2013) Fungal laccases. *Fungal Biology Reviews* 27: 67–82. <http://dx.doi.org/10.1016/j.fbr.2013.07.001>.
61. Pérez-Echavarría N, Jaramillo Jaramillo D, Ruiz Villadiego O, Párra Sánchez L (2018) Caracterización óptica de la materia orgánica de un andisol del oriente antioqueño, Colombia. *Revista de la Facultad de Ciencias Veterinarias* 7: 40–55. <http://doi.org/10.15446/rev.fac.cienc.v7n1.68243>.

62. Rubenacker A, Campitelli P, Sereno R, Ceppi S (2011) Recuperación Química de un suelo degradado mediante la utilización de un vermicomposto. *Avances en Ciencias e Ingeniería* 2: 83–95.
63. Szajdak LW, Maryganova V, Skakovskii E, Tychinskaya L (2016) Transformations of Organic Matter in Soils Under Shelterbelts of Different Ages in Agricultural Landscape: Springer, Cham. 211–246 p.
64. Reddy S, Nagaraja MS, Raj TP, Patil AP, Dumgond P (2014) Elemental analysis, E4/E6 ratio and total acidity of soil humic and fulvic acids from different land use systems. *Annals of Plant and Soil Research* 16: 89–92.
65. Tchegueni S, Koriko M, Koledzi E, Bodjona MB, Kili KA, Tchabbedji G, et al. (2013) Physicochemical characterization of organic matter during co-composting of shea-nut cake with goat manure. *African Journal of Biotechnology* 12: 3466–3471.
66. de Campos SX, Resseti RR, Zittel R (2014) Monitoring and characterization of compost obtained from household waste and pine sawdust in a facultative reactor by conventional and spectroscopic analyses. *Waste Management and Research* 32: 1186–1191. <https://doi.org/10.1177/0734242X14543817> PMID: 25106532
67. Pollegioni L, Tonin F, Rosini E (2015) Lignin-degrading enzymes. *The FEBS Journal* 282: 1190–1213. <https://doi.org/10.1111/febs.13224> PMID: 25649492
68. Schwarzw FWMR(2007) Wood decay under the microscope. *Fungal Biology Reviews* 21: 133–170.
69. Baiocco P, Barreca AM, Fabbrini M, Galli C, Gentili P (2003) Promoting laccase activity towards non-phenolic substrates: a mechanistic investigation with some laccase–mediator systems. *Organic and Biomolecular Chemistry* 1: 191–197. PMID: 12929410
70. Balart JF, Montanes N, Fombuena V, Boronat T, Sánchez-Nacher L (2018) Disintegration in Compost Conditions and Water Uptake of Green Composites from Poly(Lactic Acid) and Hazelnut Shell Flour. *Journal of Polymer Environment* 26: 701–715. <http://dx.doi.org/10.1007/s10924-017-0988-3>.
71. Jesus J, Frascari D, Pozdniakova T, Danko AS (2016) Kinetics of aerobic cometabolic biodegradation of chlorinated and brominated aliphatic hydrocarbons: A review. *Journal of Hazardous Materials* 309: 37–52. <https://doi.org/10.1016/j.jhazmat.2016.01.065> PMID: 26874310
72. Sheik S, Chandrashekar KR, Swaroop K, Somashekarappa HM (2015) Biodegradation of gamma irradiated low density polyethylene and polypropylene by endophytic fungi. *International Biodeterioration & Biodegradation* 105: 21–29. <http://dx.doi.org/10.1016/j.ibiod.2015.08.006>.
73. Morent R, De Geyter N, Leys C, Gengembre L, Payen E (2007) Study of the ageing behaviour of polymer films treated with a dielectric barrier discharge in air, helium and argon at medium pressure. *Surface & Coatings Technology* 201: 7847–7854. <http://dx.doi.org/10.1016/j.surfcoat.2007.03.018>.
74. Kumanayaka TO (2010) Photo-oxidation and biodegradation of polyethylene nanocomposites [Doctoral]: RMIT University. 240 p.
75. Gulmine JV, Janissek PR, Heise HM, Akcelrud L (2002) Polyethylene characterization by FTIR. *Polymer Testing* 21: 557–563. [http://dx.doi.org/10.1016/S0142-9418\(01\)00124-6](http://dx.doi.org/10.1016/S0142-9418(01)00124-6).
76. Portillo F, Yashchuk O, Hermida E (2016) Evaluation of the rate of abiotic and biotic degradation of oxo-degradable polyethylene. *Polymer Testing* 53: 58–69. <http://dx.doi.org/10.1016/j.polymertesting.2016.04.022>.
77. Rodrigues da Luz JM, Paes SA, Ribeiro KVG, Mendes IR, Kasuya MCM (2015) Degradation of Green Polyethylene by *Pleurotus ostreatus*. *Plos One* 10: e0126047. <https://doi.org/10.1371/journal.pone.0126047> PMID: 26076188.
78. Rodrigues da Luz JM, Albino Paes S, Dias Nunes M, de Cássia Soares da Silva M, Megumi Kasuya MC(2013) Degradation of oxo-biodegradable plastic by *Pleurotus ostreatus*. *Plos One* 8: e69386. <https://doi.org/10.1371/journal.pone.0069386> PMID: 23967057.
79. Manzur A, Limón-González M, Favela-Torres E (2004) Biodegradation of physicochemically treated LDPE by a consortium of filamentous fungi. *Journal of Applied Polymer Science* 92: 265–271.
80. Awad YM, Ok YS, Abrigata J, Beiyuan J, Beckers F, Daniel CW, et al. (2018) Pine sawdust biomass and biochars at different pyrolysis temperatures change soil redox processes. *Science of the Total Environment* 625: 147–154. <https://doi.org/10.1016/j.scitotenv.2017.12.194> PMID: 29289000
81. Ahmad M, Lee SS, Rajapaksha AU, Vithanage M, Zhang M, Cho JS, et al. (2013) Trichloroethylene adsorption by pine needle biochars produced at various pyrolysis temperatures. *Bioresource Technology* 143: 615–622. <https://doi.org/10.1016/j.biortech.2013.06.033> PMID: 23838320
82. de Oliveira Mendes G, Lopez Zafra D, Vassilev NB, Ribeiro Silva I, Ribeiro JI, Dutra Costa M, et al. (2014) Biochar Enhances *Aspergillus niger* Rock Phosphate Solubilization by Increasing Organic Acid Production and Alleviating Fluoride Toxicity. *Applied and Environmental Microbiology* 80: 3081–3085. <https://doi.org/10.1128/AEM.00241-14> PMID: 24610849
83. Wei Y, Zhao Y, Shi M, Cao Z, Lu Q, Yang T, et al. (2018) Effect of organic acids production and bacterial community on the possible mechanism of phosphorus solubilization during composting with enriched



- phosphate-solubilizing bacteria inoculation. *Bioresource Technology* 247: 190–199. <https://doi.org/10.1016/j.biortech.2017.09.092> PMID: 28950126
84. Oteino N, Lally RD, Kiwanuka S, Lloyd A, Ryan D, Germaine KJ, et al. (2015) Plant growth promotion induced by phosphate solubilizing endophytic *Pseudomonas* isolates. *Frontiers in Microbiology* 6: 745. <https://doi.org/10.3389/fmicb.2015.00745> PMID: 26257721
  85. Hui D, Yu C-L, Deng Q, Saini P, Collins K, De Koff J (2018) Weak Effects of Biochar and Nitrogen Fertilization on Switchgrass Photosynthesis, Biomass, and Soil Respiration. *Agriculture* 8: 143. <http://dx.doi.org/10.3390/agriculture8090143>.
  86. Alozie N, Heaney N, Lin C (2018) Biochar immobilizes soil-borne arsenic but not cationic metals in the presence of low-molecular-weight organic acids. *Science of the Total Environment* 630: 1188–1194. <https://doi.org/10.1016/j.scitotenv.2018.02.319> PMID: 29554740
  87. Foster EJ, Fogle EJ, Cotrufo MF (2018) Sorption to Biochar Impacts B-Glucosidase and Phosphatase Enzyme Activities. *Agriculture* 8: 158. <http://dx.doi.org/10.3390/agriculture8100158>.
